# Supplementary material for: Complex population evolutionary history of four cold-tolerant Notopterygium herb species in the Qinghai-Tibetan Plateau and adjacent areas
Source: PubMed Central journal article supplement (PMC6781143; doi:10.1038/s41437-019-0186-2), 2019-02-11
Supplement: 41437_2019_186_MOESM2_ESM.pdf [file 41437_2019_186_MOESM2_ESM.pdf]

**Table S1** List of sampled populations of *Notopterygium incisum*, *N. franchetii*, *N. oviforme*, and *N. forrestii*, with information on their locations (geographic coordinates, altitude), sample size (*N*), and voucher number.

| Species                                | Population     | Location              | Latitude | Longitude | Altitude (m) | <i>N</i>       | Voucher number |
|----------------------------------------|----------------|-----------------------|----------|-----------|--------------|----------------|----------------|
| <i>N. incisum</i><br>( <i>N</i> = 123) | A              | Huzhu, Qinghai        | 102.4319 | 36.8918   | 2620         | 6              | WNULZH20130807 |
|                                        | B              | Maqu, Gansu           | 102.0703 | 33.9992   | 3479         | 3              | WNULZH20130816 |
|                                        | C              | Datong, Qinghai       | 101.8527 | 37.1496   | 3030         | 5              | WNULZH20130809 |
|                                        | D              | Taibaishan, Shaanxi   | 108.7797 | 33.8532   | 2800         | 6              | WNULZH20140814 |
|                                        | E              | Guangtoushan, Shaanxi | 107.7010 | 34.0535   | 3190         | 5              | WNULZH20140823 |
|                                        | G              | Jiuzhi, Qinghai       | 101.6890 | 32.8584   | 4030         | 5              | WNULZH20140821 |
|                                        | H              | Maqin, Qinghai        | 100.1971 | 34.4904   | 4030         | 6              | WNULZH20140824 |
|                                        | I              | Tongde, Qinghai       | 100.5467 | 35.2760   | 3259         | 6              | WNULZH20130822 |
|                                        | J              | Aba, Sichuan          | 101.0998 | 33.3834   | 4030         | 5              | WNULZH20130729 |
|                                        | L              | Kangding, Sichuan     | 101.9669 | 29.9889   | 3560         | 3              | WNUJY20150915  |
|                                        | N              | Yajiang, Sichuan      | 101.3272 | 30.0611   | 4000         | 5              | WNUJY20150910  |
|                                        | Q              | Yaan, Sichuan         | 102.8176 | 30.3683   | 3450         | 5              | WNUJY20150903  |
|                                        | S              | Muli, Sichuan         | 100.6510 | 28.2637   | 3750         | 4              | WNUJY20150720  |
|                                        | T              | Qinglin, Qinghai      | 101.5308 | 37.3207   | 3200         | 2              | WNULZH20150718 |
|                                        | U              | Daofu, Sichuan        | 101.3827 | 31.4693   | 3920         | 4              | WNULZH20150722 |
|                                        | V              | Xiaojinxian, Sichuan  | 102.6387 | 32.1214   | 3219         | 5              | WNUFWB20160721 |
|                                        | W              | Xiaojinxian, Sichuan  | 102.7960 | 32.2397   | 3900         | 4              | WNUFWB20160725 |
|                                        | X              | Ganzi, Sichuan        | 100.4784 | 32.3010   | 4073         | 5              | WNUFWB20160727 |
|                                        | Y              | Luhuo, Sichuan        | 101.5596 | 31.8943   | 3465         | 5              | WNUFWB20160719 |
|                                        | Z              | Yuzhong, Gansu        | 104.3609 | 35.7667   | 3046         | 5              | WNULZH20130717 |
| HA                                     | Tianzhu, Gansu | 103.2543              | 37.9120  | 3102      | 5            | WNUJY20150710  |                |
| HB                                     | Danba, Sichuan | 102.1853              | 30.9336  | 3708      | 5            | WNULZH20130912 |                |

|                                           |    |                     |          |         |      |   |                 |
|-------------------------------------------|----|---------------------|----------|---------|------|---|-----------------|
|                                           | HC | Maerkang, Sichuan   | 103.3876 | 32.7876 | 4652 | 5 | WNUJY20151106   |
|                                           | HF | Taibaishan, Shaanxi | 108.2255 | 34.9387 | 3323 | 5 | WNUJY20151203   |
|                                           | HH | Zhouqu, Gansu       | 104.5107 | 34.1207 | 3360 | 5 | WNULZH20130807  |
|                                           | HI | Datong, Qinghai     | 102.2979 | 38.1388 | 3150 | 5 | WNULZH20130812  |
|                                           | KA | Huzhu, Qinghai      | 102.4319 | 36.8918 | 2110 | 6 | WNULZH20140903  |
|                                           | KC | Hepingzhen, Gansu   | 103.9551 | 36.0039 | 2450 | 6 | WNULZH20140805  |
|                                           | KD | Minhe, Qinghai      | 102.7054 | 36.0847 | 2450 | 6 | WNULZH20130915  |
|                                           | KF | Yuzhong, Gansu      | 104.0576 | 35.7966 | 2484 | 6 | WNULZH20130809  |
|                                           | KG | Yaan, Sichuan       | 102.8176 | 30.3683 | 2890 | 5 | WNULZH20140816  |
|                                           | KH | Datong, Qinghai     | 101.8527 | 37.1496 | 2319 | 6 | WNULZH20140824  |
|                                           | KI | Maqu, Gansu         | 102.0703 | 33.9992 | 2379 | 5 | WNULZH20140817  |
|                                           | KJ | Tongde, Qinghai     | 100.5467 | 35.2760 | 2273 | 6 | WNULZH201340910 |
|                                           | KK | Nuoergai, Sichuan   | 102.9615 | 33.5903 | 3526 | 6 | WNULZH20130903  |
| <i>N. franchetii</i><br>( <i>N</i> = 135) | KL | Datong, Qinghai     | 101.5308 | 37.3207 | 3200 | 5 | WNUJY20150706   |
|                                           | KM | Yundingshan, Shanxi | 111.5310 | 37.8906 | 2543 | 5 | WNUJY20151106   |
|                                           | KO | Zhangye, Gansu      | 101.4667 | 38.7167 | 2800 | 5 | WNULZH20140801  |
|                                           | KQ | Yuzhong, Gansu      | 104.0375 | 35.7778 | 2400 | 4 | WNULZH20140802  |
|                                           | KR | Dangchang, Gansu    | 104.2590 | 34.2257 | 2470 | 3 | WNULZH20130406  |
|                                           | KV | Hezheng, Gansu      | 103.3487 | 35.4249 | 2143 | 4 | WNULZH20131110  |
|                                           | KX | Datong, Qinghai     | 101.4009 | 37.0841 | 2058 | 6 | WNUJY20150731   |
|                                           | KZ | Jishishan, Gansu    | 102.8741 | 35.7181 | 2281 | 6 | WNUJY20150725   |
|                                           | YA | Weiyuan, Gansu      | 103.9837 | 35.1236 | 2934 | 5 | WNUJY20150720   |
|                                           | YB | Yuzhong, Gansu      | 104.6745 | 35.3105 | 2847 | 5 | WNUJY20150721   |
|                                           | YC | Daofu, Sichuan      | 101.3204 | 31.8563 | 3189 | 5 | WNULZH2015071   |
|                                           | YD | Danba, Sichuan      | 102.2000 | 30.5667 | 3318 | 4 | WNULZH20150727  |
|                                           | YE | Tianzhu, Gansu      | 103.4026 | 37.5991 | 2816 | 5 | WNUJY20150721   |

|                                         |     |                             |          |         |      |   |                |
|-----------------------------------------|-----|-----------------------------|----------|---------|------|---|----------------|
|                                         | YF  | Luhuo, Sichuan              | 101.2373 | 31.8869 | 3246 | 5 | WNUJY20150804  |
|                                         | YH  | Zhouqu, Gansu               | 105.0310 | 33.6443 | 1823 | 5 | WNULZH20150410 |
|                                         | YJ  | Pingan, Qinghai             | 102.8747 | 36.7249 | 2690 | 5 | WNULZH20150912 |
|                                         | YK  | Datong, Qinghai             | 102.3506 | 37.1864 | 3058 | 3 | WNUFWB20160911 |
|                                         | YM  | Fuzhong, Qinghai            | 102.2593 | 37.1722 | 2958 | 3 | WNUFWB20160721 |
|                                         | LA  | Taibaishan, Shaanxi         | 107.7011 | 34.0535 | 3190 | 5 | WNUFWB20160819 |
|                                         | LB  | Xihuazhen, Gansu            | 106.5856 | 35.1610 | 2650 | 4 | WNUFWB20160824 |
|                                         | LC  | Longxian, Shaanxi           | 106.6734 | 35.0690 | 2568 | 5 | WNULZH20130704 |
|                                         | LD  | Zhuque Forest Park, Shaanxi | 108.5268 | 33.9248 | 1890 | 4 | WNUJY20150519  |
|                                         | LE  | Jiwozi, Shaanxi             | 108.8230 | 33.8205 | 2430 | 4 | WNUJY20150717  |
|                                         | LF  | Gangu, Gansu                | 105.1848 | 34.5744 | 2234 | 2 | WNUJY20151001  |
|                                         | LG  | Xihuazhen, Gansu            | 106.5821 | 35.1609 | 2480 | 5 | WNULZH20150704 |
| <i>N. oviforme</i><br>( <i>N</i> = 66)  | LK  | Fengyukou, Shaanxi          | 108.7230 | 33.7205 | 2300 | 4 | WNULZH20150730 |
|                                         | LO  | Xunyangba, Shaanxi          | 109.0716 | 34.4095 | 2410 | 5 | WNUFWB20160728 |
|                                         | LP  | Longxian, Shaanxi           | 107.1761 | 35.5032 | 2153 | 4 | WNUFWB20160722 |
|                                         | LQ  | Fengyukou, Shaanxi          | 108.6230 | 33.6205 | 2300 | 5 | WNUFWB20160804 |
|                                         | LR  | Jiwozi, Shaanxi             | 108.8230 | 33.8205 | 2430 | 5 | WNUFWB20160812 |
|                                         | LT  | Guanshan, Gansu             | 106.4023 | 35.1588 | 2427 | 4 | WNULZH20130817 |
|                                         | LU  | Guanshan, Gansu             | 106.6532 | 35.2183 | 2387 | 5 | WNUJY20150708  |
|                                         | LV  | Zhuque Forest Park, Shaanxi | 108.5268 | 33.9248 | 1890 | 5 | WNULZH20130726 |
|                                         | LQA | Yajiang, Sichuan            | 100.5662 | 30.1583 | 4164 | 5 | WNUJY20150728  |
| <i>N. forrestii</i><br>( <i>N</i> = 16) | LQB | Yajiang, Sichuan            | 100.7859 | 30.0441 | 4220 | 3 | WNULZH20130729 |
|                                         | LQC | Litang, Sichuan             | 100.3092 | 29.9981 | 4010 | 4 | WNUJY20150724  |
|                                         | LQD | Kalazishan, Sichuan         | 100.6326 | 30.1369 | 4300 | 4 | WNULZH20130726 |

**Table S2** Details of primers used in this study.

| Primer             | Primer sequence (5'–3')                                    | Annealing temperature | Gene/Gene product                                              |
|--------------------|------------------------------------------------------------|-----------------------|----------------------------------------------------------------|
| 35                 | F: GATTGGTCGGATGGAAAAGG<br>R: GGCACCAGACCCTTCAATGT         | 60.0 °C               | Pentatricopeptide repeat-containing protein At3g15200          |
| OG29101            | F: TTTTAGTTCGCTCACCTGCC<br>R: CCAACTTCTCAACTCAGTGGT        | 51.2 °C               | Pre-mRNA-splicing factor ATP-dependent RNA helicase DEAH1-like |
| 9122               | F: TCTCATTAGAAAAACCATCCA<br>R: ATGATTCTCAATCCTTGCATA       | 56.9 °C               | Calcium-binding protein CML47                                  |
| 25629              | F: TTGGTTTTCTACTTGGGCTT<br>R: TTGGTCTTGGACAACCTTCA         | 54.6 °C               | Serine/threonine receptor-like kinase NFP                      |
| 25679              | F: AAAGTTCAGTACGGACGCTGT<br>R: ACTCCCTATGGCTCTTGTTG        | 55.0 °C               | Hypothetical protein                                           |
| 29206              | F: ACCTTCTCCGAAACCTACCAAT<br>R: TAGCCGAAGAGTTGAAATTGCT     | 58.0 °C               | Glutathione S-transferase                                      |
| 32125              | F: CAGTTGAAAGTCCTGAGCAGT<br>R: GTGTGGTTTGATTATCGGTCCG      | 52.0 °C               | Hypothetical protein                                           |
| 51964              | F: TTGTCAGATCTATTCGTTCTCG<br>R: TCAGATAGGCAACAGTCTTCAG     | 58.0 °C               | 50S ribosomal protein L7/L12                                   |
| OG29960            | F: TGTAGTCATTCAGGTTTAGTCAG<br>R: AGTCTCTCGCTGTGGTCAAG      | 59.2 °C               | Pentatricopeptide repeat-containing protein At5g13270          |
| OG29988            | F: TGAAAAAATCCCTACCAGC<br>R: AGTAGGTGAGTTAGTAGTATCCA       | 54.6 °C               | Nuclear transcription factor Y subunit B-3-like                |
| OG28079<br>(cpDNA) | F: GAAGAAGTCCCCTCCTATTA<br>R: AAGTTGGTCATATCATTGCC         | 52.0 °C               | <i>ndhF</i>                                                    |
| OG537<br>(mtDNA)   | F: TTTCTGGTTTACACGACTTCAGGC<br>R: CCATCTTCCGCATATCTTGCTCAT | 55.0 °C               | <i>nad5</i>                                                    |
| OG917<br>(mtDNA)   | F: CCCCAACTCAATCAATATCA<br>R: GGGAACCATCACAAGTACGG         | 53.5 °C               | <i>orf33-nad1</i>                                              |

**Table S3** Parameters used as prior settings in DIYABC analysis.

| <b>Parameter</b>           | <b>Scenario</b>     |                      |                      |
|----------------------------|---------------------|----------------------|----------------------|
|                            | <b>Distribution</b> | <b>Minimum</b>       | <b>Maximum</b>       |
| Effective population size  |                     |                      |                      |
| NA                         | uniform             | 100                  | 1000000              |
| N1                         | uniform             | 100                  | 1000000              |
| N2                         | uniform             | 100                  | 1000000              |
| N3                         | uniform             | 100                  | 1000000              |
| N4                         | uniform             | 100                  | 1000000              |
| N5                         | uniform             | 100                  | 1000000              |
| Time of events             |                     |                      |                      |
| t1                         | uniform             | 1000                 | 500000               |
| t2                         | uniform             | 5000                 | 1000000              |
| Mean mutation rate uniform | uniform             | $6.1 \times 10^{-9}$ | $1.5 \times 10^{-8}$ |

**Table S4** Details of the 19 ecological variables employed in this study.

---

| <b>Variables</b> |                                                      |
|------------------|------------------------------------------------------|
| Bio1             | Annual Mean Temperature                              |
| Bio2             | Mean Monthly Temperature Range                       |
| Bio3             | Isothermality (bio2/bio7) (*100)                     |
| Bio4             | Temperature Seasonality (standard deviation *100)    |
| Bio5             | Max. Temperature of Warmest Month                    |
| Bio6             | Min. Temperature of Coldest Month                    |
| Bio7             | Temperature Annual Range (bio5 – bio6)               |
| Bio8             | Mean Temperature of Wettest Quarter                  |
| Bio9             | Mean Temperature of Driest Quarter                   |
| Bio10            | Mean Temperature of Warmest Quarter                  |
| Bio11            | Mean Temperature of Coldest Quarter                  |
| Bio12            | Annual precipitation                                 |
| Bio13            | Precipitation of Wettest Month                       |
| Bio14            | Precipitation of Driest Month                        |
| Bio15            | Precipitation Seasonality (Coefficient of Variation) |
| Bio16            | Precipitation of Wettest Quarter                     |
| Bio17            | Precipitation of Driest Quarter                      |
| Bio18            | Precipitation of Warmest Quarter                     |
| Bio19            | Precipitation of Coldest Quarter                     |

---

**Table S5** Sampling location information in ecological niche modeling (ENM). CVH (Chinese Virtual Herbarium), NSII (National Specimen Information Infrastructure).

| Species           | Longitude | Latitude | Accession number | Collectors   | Date       | Location (Province, locality) | Source | Reliability & accuracy |
|-------------------|-----------|----------|------------------|--------------|------------|-------------------------------|--------|------------------------|
|                   | 95.1408   | 34.8768  | -                | -            | -          | Qinghai, Qumalaixian          | CVH    | Confirmed              |
|                   | 96.6721   | 32.9226  | 19960829         | T.N. Ho      | 1996-08-29 | Qinghai, Nongqie              | NSII   | Confirmed              |
|                   | 97.0020   | 33.9351  | 19960814         | T.N. Ho      | 1996-08-14 |                               | NSII   | Confirmed              |
|                   | 97.0133   | 33.0062  | 19710708         | Benzaho Guo  | 1971-07-08 | Qinghai, Yushu                | NSII   | Confirmed              |
|                   | 98.2050   | 33.1876  | -                | -            | -          | Sichuan, Shiquxian            | NSII   | Confirmed              |
|                   | 98.9675   | 32.0594  | WUK0300999       | Yeqi He      | 1976-08-28 | Sichuan, Queer Mountain       | CVH    | Confirmed              |
|                   | 99.3268   | 38.9205  | PE00931566       | -            | 1964-07-24 | Gansu, Sunanyuguzhixian       | CVH    | Confirmed              |
|                   | 99.4108   | 33.4826  | HNWP152166       | -            | -          | Qinghai, Darixian             | CVH    | Confirmed              |
|                   | 99.7113   | 38.3279  | WUK0101066       | Buqiu Zhong  | 1958-07-29 | Qinghai, Niuxin Mountain      | CVH    | Confirmed              |
|                   | 99.7333   | 35.5403  | WUK0290402       | Tingnong He  | 1965-08-23 | Qinghai, Hekaqieji Mountain   | CVH    | Confirmed              |
|                   | 99.7943   | 34.5040  | HNWP172134       | H. B. G      | 1993-08-06 | Qinghai, Dawuxiang            | CVH    | Confirmed              |
|                   | 99.8609   | 36.9956  | -                | -            | --         | Qinghai, Qunjicun             | CVH    | Confirmed              |
| <i>N. incisum</i> | 100.0648  | 36.5383  | 19750808         | Benzhao Guo  | 1975-08-08 | Qinghai, Xinzhe               | NSII   | Confirmed              |
| ( <i>N</i> = 109) | 100.1851  | 29.8952  | SM715003986      | Lipu's group | -          | Sichuan, Lazhe                | CVH    | Confirmed              |
|                   | 100.1971  | 34.4904  | HNWP101264       | -            | 1981-07-06 | Qinghai, Dangluoniyagemagou   | CVH    | Confirmed              |

|          |         |             |                  |            |                           |               |             |
|----------|---------|-------------|------------------|------------|---------------------------|---------------|-------------|
| 100.2875 | 30.9457 | SM715003987 | -                | -          | Sichuan, Larima           | CVH           | Confirmed   |
| 100.4498 | 38.9259 | 20150608    | Yun Jia          | 2015-06-08 | Gansu, Zhangye            | Current study | Confirmed   |
| 100.4784 | 32.3009 | 20160722    | Weibing Fan      | 2016-07-22 | Sichuan, Zudashan         | Current study | Confirmed   |
| 100.5467 | 35.2760 | 19900816    | Yuhuo Wu         | 1990-08-16 | Qinghai, Maxiuxiang       | NSII          | Confirmed   |
| 100.5504 | 32.9097 | HNWP74136   | Benzhao Guo      | 1978-08-12 | Qinghai, Banma            | CVH           | Confirmed   |
| 100.6510 | 28.2637 | HNWP163690  | Yuhuo Wu         | 1990-07-26 | Qinghai, Longmugongma     | CVH           | Confirmed   |
| 100.6759 | 31.4921 | SM715003988 | -                | -          | Sichuan, Rendagongshe     | CVH           | Confirmed   |
| 100.8798 | 36.9606 | -           | -                | -          |                           | NSII          | Unconfirmed |
| 100.8846 | 35.6981 | HNWP0211785 | Futun Yang       | 1970-09-18 | Qinghai, Junmachuang      | CVH           | Confirmed   |
| 101.0055 | 33.4739 | HNWP23913   | Zang Yao's group | 1971-07-31 | Qinghai, Nianbao Mountain | CVH           | Confirmed   |
| 101.0597 | 32.1482 | SM715004004 | -                | -          | Sichuan, Shangzhai        | CVH           | Confirmed   |
| 101.0998 | 33.3834 | HNWP25387   | Guoluo's group   | 1971-07-12 | Qinghai, Suhurimagongshe  | CVH           | Confirmed   |
| 101.1631 | 36.6363 | 19570707    | Qinghai's group  | 1957-07-07 | Qinghai, Huangyuanxian    | NSII          | Confirmed   |
| 101.3272 | 30.0611 | 20160806    | Weibing Fan      | 2016-08-06 | Sichuan, Yajiang          | Current study | Confirmed   |
| 101.3827 | 31.4693 | 19750928    | -                | 1975-09-28 | Sichuan, Jinchuanxian     | NSII          | Confirmed   |
| 101.4009 | 37.1007 | -           | -                | -          | Qinghai, Machangzhuangcun | NSII          | Confirmed   |
| 101.4354 | 35.1392 | HNWP18837   | -                | 1967-08-03 | Qinghai, Zekuxian         | CVH           | Confirmed   |
| 101.4905 | 37.1206 | -           | -                | -          | Qinghai, Datongxian       | CVH           | Confirmed   |
| 101.5445 | 36.5797 | HNWP153392  | Tingnong He      | 1989-07-20 | Qinghai, Qunjiaxiang      | CVH           | Confirmed   |



|          |         |             |                 |            |                                 |               |           |
|----------|---------|-------------|-----------------|------------|---------------------------------|---------------|-----------|
| 101.5563 | 34.5113 | HNWP18767   | -               | 1967-07-16 | Qinghai, Ningmutexiang          | CVH           | Confirmed |
| 101.5596 | 31.8943 | 21387       | -               | -          | Sichuan, Wanlinxilizhai         | NSII          | Confirmed |
| 101.5861 | 26.9401 | -           | -               | -          | Sichuan, Panzhihua              | NSII          | Confirmed |
| 101.6351 | 28.9178 | SM715003968 | -               | -          | Sichuan, Sanyanlonggongshe      | NSII          | Confirmed |
| 101.6690 | 33.8507 | 20080917    | -               | 2008-09-17 | Gansu, Dianzhangou              | NSII          | Confirmed |
| 101.6890 | 32.8584 | 20130821    | Yun Jia         | 2013-08-21 | Qinghai, Jiuzhixian             | Current study | Confirmed |
| 101.7313 | 37.4583 | -           | -               | -          | Qinghai, Menyuanxian            | CVH           | Confirmed |
| 101.7524 | 30.9670 | SM715003995 | -               | -          | Sichuan, Dandonggongshe         | CVH           | Confirmed |
| 101.7553 | 29.9579 | SM715003971 | -               | -          | Sichuan, Ertaiqi                | CVH           | Confirmed |
| 101.7679 | 36.6407 | -           | -               | -          | Qinghai, Xiningshi Chengbaiqu   | NSII          | Confirmed |
| 101.8048 | 31.5275 | 19750928    | Sichuan's group | 1975-09-28 | Sichuan, Anningqu               | NSII          | Confirmed |
| 101.8527 | 37.1496 | 20130809    | Zhonghu Li      | 2013-08-09 | Qinghai, Datongxian Shangtancun | Current study | Confirmed |
| 101.8873 | 29.5993 | 19820702    | Zhibei's group  | 1982-07-02 | Sichuan, Ludingxian             | NSII          | Confirmed |
| 101.9669 | 29.9889 | SM715003985 | Zi Kang         | -          | Sichuan, Chengjiao              | CVH           | Confirmed |
| 101.9692 | 30.0551 | 19530925    | Shanyong Chen   | 1953-09-25 | Sichuan, Huopao Mountain        | NSII          | Confirmed |
| 102.0076 | 35.5228 | 20130816    | Zhonghu Li      | 2013-08-16 | Gansu, Maquxiancheng            | Current study | Confirmed |
| 102.0233 | 32.0193 | SM715003955 | -               | -          | Sichuan, Maerkang               | CVH           | Confirmed |
| 102.0703 | 33.9992 | 19610804    | -               | 1961-08-04 | Gansu, Maquxian                 | NSII          | Confirmed |
| 102.1201 | 29.7477 | 19800907    | -               | 1980-09-07 | Sichuan, Ludingxian             | NSII          | Confirmed |
| 102.1853 | 30.9335 | SM715003959 | -               | -          | Sichuan, Danba                  | CVH           | Confirmed |

|          |         |             |               |            |                                     |               |             |
|----------|---------|-------------|---------------|------------|-------------------------------------|---------------|-------------|
| 102.2285 | 31.9057 | SM715003965 | Jiudan Li     | -          | Sichuan, Aba Maerkang               | CVH           | Confirmed   |
| 102.2979 | 38.1388 | 20160912    | Weibing Fan   | 2016-09-12 | Qinghai, Datongxian Dongxialinchang | Current study | Confirmed   |
| 102.4297 | 36.5078 | HNWP130509  | Yuhuo Wu      | 1986-07-22 | Qinghai, Yaotailinchang             | CVH           | Confirmed   |
| 102.4319 | 36.8918 | HNWP130677  | Yuhuo Wu      | 1986-07-15 | Qinghai, Beishanglinchang           | CVH           | Confirmed   |
| 102.4775 | 34.3926 | -           | -             | -          | Gansu, Larenguanxiang               | NSII          | Confirmed   |
| 102.5066 | 35.0230 | 13699       | K.T. Fu       | -          | Gansu, Xiahexian                    | NSII          | Confirmed   |
| 102.5783 | 30.0788 | -           | -             | -          | Sichuan, Yaan Tianquexian           | CVH           | Confirmed   |
| 102.6387 | 32.1214 | SM715003917 | Jiudan Li     | -          | Sichuan, Sandaguxiang               | CVH           | Confirmed   |
| 102.6411 | 32.7361 | 19640623    | Bingzhi Ni    | 1964-06-23 | Sichuan, Hongyuanxian               | NSII          | Confirmed   |
| 102.7612 | 37.2809 | WUK0156621  | Yeqi He       |            | Gansu, Tianzhu                      | CVH           | Unconfirmed |
| 102.7759 | 36.1577 | 19580823    | Yaoting Zhang | 1958-08-23 | Qinghai, Minghe                     | NSII          | Confirmed   |
| 102.8176 | 30.3683 | 20150915    | Yun Jia       | 2015-09-15 | Sichuan, Yaanxian Baoxingxian       | Current study | Confirmed   |
| 102.8955 | 33.6688 | SM715003907 | -             | -          | Sichuan, Baxigongshe                | CVH           | Confirmed   |
| 102.8992 | 30.3674 | 20150915    | Yun Jia       | 2015-09-16 | Sichuan, Baoxingxian                | Current study | Confirmed   |
| 103.0554 | 32.1653 | SM715003918 | Jiudan Li     | -          | Sichuan, Aba Sandaguxiang           | CVH           | Confirmed   |
| 103.2527 | 36.6169 | -           | -             | -          | Gansu, Yongdengxian                 | NSII          | Confirmed   |
| 103.2543 | 37.9120 | 20160727    | Weibing Fan   | 2016-07-27 | Gansu, Tianzhuxian                  | Current study | Confirmed   |
| 103.2943 | 31.1687 | SM715003979 | Tianlun Dai   | -          | Sichuan, Wenchuan                   | CVH           | Confirmed   |
| 103.3875 | 32.7876 | 19840802    | Fading Bo     | 1984-08-02 | Sichuan, Huangsheng                 | NSII          | Confirmed   |

|          |         |             |                      |            |                                 |               |           |
|----------|---------|-------------|----------------------|------------|---------------------------------|---------------|-----------|
| 103.3936 | 34.6144 | 14857       | W.Y. H               | -          | Gansu, Zhuonixain               | CVH           | Confirmed |
| 103.4009 | 29.5070 | 19640705    | Qiqing Li            | 1964-07-05 | Sichuan, Emei Mountain          | CVH           | Confirmed |
| 103.5327 | 32.6254 | 19840830    | Jin Yao              | 1984-08-30 | Sichuan, Songpanbu              | CVH           | Confirmed |
| 103.5704 | 34.0056 | 19600923    | Zexiang Pen          | 1960-09-23 | Gansu, Diebuxian                | CVH           | Confirmed |
| 103.6290 | 35.2580 | 19920709    | Ze Yang              | 1992-07-09 | Gansu, Lianhua Mountain         | CVH           | Confirmed |
| 103.6319 | 34.7426 | WUK0092068  | W.Y. H               | 1940-09-22 | Gansu, Lintan                   | CVH           | Confirmed |
| 103.6350 | 31.8557 | SM715003973 | Maowen's group       | -          | Sichuan, Maowenqiangzuzizhixian | CVH           | Confirmed |
| 104.0198 | 31.2936 | -           | -                    | -          | Sichuan, Xuemensi               | CVH           | Confirmed |
| 104.0679 | 30.6799 | 19790409    | -                    | 1979-04-09 | Sichuan, Chengdou               | NSII          | Confirmed |
| 104.2467 | 34.4296 | WUK0033853  | T.P. Wang            | 1937-08-23 | Gansu, Minxian Min Mountain     | CVH           | Confirmed |
| 104.2583 | 31.9625 | -           | -                    | -          | Sichuan, Mianyang Beichuan      | NSII          | Confirmed |
| 104.3263 | 33.6348 | 19980721    | Bailongjiang's group | 1998-07-21 | Gansu, Zhouqixian               | NSII          | Confirmed |
| 104.3608 | 35.7666 | 19590907    | -                    | 1959-09-07 | Gansu, Yuzhong Lapulen          | NSII          | Confirmed |
| 104.4043 | 32.4469 | -           | -                    | -          | Sichuan, Mianyang Pinwuxian     | CVH           | Confirmed |
| 104.5106 | 34.1207 | 20160802    | Weibing Fan          | 2016-08-02 | Gansu, Zhouqu Lizigou           | Current study | Confirmed |
| 104.7842 | 32.9472 | 19590801    | Wenxian's group      | 1959-08-01 | Gansu, Wenxian Zhongzhai        | NSII          | Confirmed |
| 107.4168 | 33.9429 | 21387       | Zhiping Wei          | -          | Shaanxi, Taibai                 | CVH           | Confirmed |
| 107.7010 | 34.0535 | 19561008    | Qunjun Fu            | 1956-10-08 | Shaanxi, Taibai Mountain        | CVH           | Confirmed |
| 108.2255 | 34.9387 | 19380908    | W.Y. H               | 1938-09-08 | Shanxi, Meixian                 | NSII          | Confirmed |
| 108.7797 | 33.8532 | 21043       | Kunjun Fu            | -          | Shanxi, Jiwozi                  | NSII          | Confirmed |

|          |         |             |                 |            |                                 |               |           |
|----------|---------|-------------|-----------------|------------|---------------------------------|---------------|-----------|
| 109.4567 | 31.9392 | -           | -               | -          | Shaanxi, Ankang                 | NSII          | Confirmed |
| 99.5636  | 35.5586 | HNWP001501  | -               | 1963-07-15 | Qinghai, Tangxia                | NSII          | Confirmed |
| 99.6155  | 38.8369 | WUK0157576  | Yeqi He         | 1959-06-30 | Gansu, Qilian Mountain          | CVH           | Confirmed |
| 99.6734  | 34.5688 | HNWP161380  | Yuhuo Wu        | 1990-08-07 | Qinghai, Maqin                  | CVH           | Confirmed |
| 99.9926  | 31.6229 | SM715004007 | -               | -          | Sichuan, Ganzi                  | CVH           | Confirmed |
| 100.2954 | 34.4774 | HNWP104595  | Weiyi Wang      | 1983-07-29 | Qinghai, Makehe                 | CVH           | Confirmed |
| 100.5401 | 32.8929 | NAS00022707 | Dashang Luo     | 1980-08-06 | Qinghai, Banmaxian Banqi        | CVH           | Confirmed |
| 100.6181 | 35.1492 | HNWP171412  | H. B. G         | 1993-07-22 | Qinghai, Tongde                 | CVH           | Confirmed |
| 100.9729 | 36.9433 | WUK0459457  | Huangtu's group | 1985-07-16 | Qinghai, Hebeizangzu Menyuan    | CVH           | Confirmed |
| 101.0885 | 38.7846 | WUK0155928  | Yeqi He         | 1959-07-09 | Gansu, Shandan Dahuang Mountain | CVH           | Confirmed |
| 101.1252 | 30.9795 | -           | -               | -          | Sichuan, Daofu Wariqu           | CVH           | Confirmed |
| 101.2070 | 36.6390 | HNWP133556  | Jinye Ding      | 1961-09-12 | Qinghai, Huangyuanxian          | CVH           | Confirmed |
| 101.2794 | 27.9286 | -           | -               | -          | Sichuan, Mulizangzu             | CVH           | Confirmed |
| 101.3203 | 31.8562 | 20160720    | Weibing Fan     | 2016-07-20 | Sichuan, Mazixiang              | Current study | Confirmed |
| 101.3888 | 35.1684 | HNWP22991   | Lihua Zhou      | 1970-08-25 | Qinghai, Zekuxian               | CVH           | Confirmed |
| 101.4008 | 37.0840 | 20140809    | Weibing Fan     | 2014-08-09 | Qinghai, Datongxian Qinlinxiang | Current study | Confirmed |
| 101.4667 | 38.7167 | 20150607    | Yun Jia         | 2015-06-07 | Gansu, Zhangye                  | Current study | Confirmed |
| 101.4771 | 35.9343 | HNWP152898  | Shangwu Liu     | 1989-07-24 | Qinghai, Guidexian              | CVH           | Confirmed |

|                      |          |         |            |                |            |                                  |               |             |
|----------------------|----------|---------|------------|----------------|------------|----------------------------------|---------------|-------------|
|                      | 101.5159 | 34.5667 | HNWP31962  | Benzhao Guo    | 1972-07-19 | Qinghai, Henanmenguzu            | CVH           | Confirmed   |
|                      | 101.6157 | 36.4716 | HNWP153353 | Tingnong He    | 1989-07-20 | Qinghai, Huangzhongxian Qunjia   | CVH           | Confirmed   |
|                      | 101.6856 | 36.9269 | HNWP154640 | Lijuan Mei     | 1989-08-11 | Qinghai, Datongxain              | CVH           | Confirmed   |
|                      | 101.7066 | 32.9024 | -          | -              | -          | Sichuan, Abaxian                 | CVH           | Confirmed   |
|                      | 101.7608 | 37.5031 | HNWP186601 | Zhenlan Wu     | 1999-08-25 | Qinghai, Menyuan                 | CVH           | Unconfirmed |
|                      | 101.7846 | 36.6306 | WUK0011086 | H. Ho          | 1930-08-03 | Qinghai, Xining                  | CVH           | Confirmed   |
| <i>N. franchetii</i> | 101.8527 | 37.1496 | 20130809   | Zhonghu Li     | 2013-08-09 | Qianghai, Datongxian Shangtancun | Current study | Confirmed   |
| ( <i>N</i> = 45)     | 101.8657 | 30.1413 | -          | -              | -          | Sichuan, Yidun                   | CVH           | Confirmed   |
|                      | 101.9781 | 36.3938 | HNWP174075 | Xuefeng Lu     | 1994-08-28 | Qinghai, Pingan                  | CVH           | Confirmed   |
|                      | 102.0273 | 35.5399 | HNWP102607 | Benzhao Guo    | 1982-08-17 | Qinghai, Huangnanzangzu          | CVH           | Confirmed   |
|                      | 102.0273 | 35.5399 | HNWP48288  | Zhibing Wang   | 1975-08-17 | Qinghai, Maixiulinchang          | CVH           | Confirmed   |
|                      | 102.0703 | 33.9992 | 20150903   | Yun Jia        | 2015-09-03 | Gansu, Maquxian                  | Current study | Confirmed   |
|                      | 102.1521 | 36.8521 | HNWP48251  | Benzhao Guo    | 1975-09-13 | Qinghai, Huzhutuzuzizhixian      | CVH           | Confirmed   |
|                      | 102.2000 | 30.5666 | 20160719   | Weibing Fan    | 2016-07-19 | Sichuan, Danbaxian Dongguxiang   | Current study | Confirmed   |
|                      | 102.2224 | 31.8991 | -          | Shanyong Chen  | -          | Sichuan, Abazangzuzizhizhou      | CVH           | Confirmed   |
|                      | 102.3505 | 37.1864 | 20130816   | Zhonghu Li     | 2013-08-16 | Gansu, Maqu                      | Current study | Confirmed   |
|                      | 102.4382 | 36.5098 | HNWP001502 | Qingan's group | 1959-09-12 | Qinghai, Leduxian                | CVH           | Confirmed   |
|                      | 102.4751 | 35.6778 | HNWP27549  | Benzhao Guo    | 1971-09-20 | Qinghai, Mengda                  | CVH           | Confirmed   |
|                      | 102.5217 | 35.2025 | WUK0033935 | K.T. Fu        | 1937-07-01 | Gansu, Xiahe Qingshui            | CVH           | Confirmed   |

|           |         |             |                |            |                                   |               |           |
|-----------|---------|-------------|----------------|------------|-----------------------------------|---------------|-----------|
| 102.7054  | 36.0847 | 20130811    | Zhonghu Li     | 2013-08-11 | Qinghai, Minhexian                | Current study | Confirmed |
| 102.7963  | 36.3270 | WUK0100345  | Mingfang Zhong | 1958-10-09 | Qinghai, Qilisi                   | CVH           | Confirmed |
| 102.8176  | 30.3683 | 20150915    | Yun Jia        | 2015-09-15 | Sichuan, Yaan Baoxing             | Current study | Confirmed |
| 102.8741  | 35.7181 | -           | -              | -          | Gansu, Linxaizhou Jishishan       | Current study | Confirmed |
| 102.8746  | 36.7248 | 20160911    | Weibing Fan    | 2016-09-11 | Qinghai, Qinanxian Qunsilinchuang | Current study | Confirmed |
| 102.9618  | 33.5758 | 20130817    | Zhonghu Li     | 2013-08-17 | Sichuan, Ruoergaixian             | Current study | Confirmed |
| 103.0212  | 31.5795 | -           | -              | -          | Sichuan, Abazhou Lixian           | NSII          | Confirmed |
| 103.1321  | 28.3286 | -           | -              | -          | Sichuan, Meiguxian                | CVH           | Confirmed |
| 103.2608  | 36.7361 | HNWP165839  | Tingnong He    | 1991-07-10 | Gansu, Yongdengxian               | CVH           | Confirmed |
| 103.2670  | 31.0840 | -           | -              | -          | Sichuan, Wolong                   | CVH           | Confirmed |
| 103.3487  | 35.4249 | -           | -              | -          | Gansu, Linxiazhou Hezhengxian     | Current study | Confirmed |
| 103.4026  | 37.5991 | 20160727    | Zhonghu Li     | 2016-07-27 | Gansu, Wuweitianzhutan Mountain   | Current study | Confirmed |
| 103.5071  | 34.5895 | WUK0067161  | T.P. Wang      | 1936-07-24 | Gansu, Zhuoni                     | CVH           | Confirmed |
| 103.5989  | 32.6379 | -           | -              | -          | Sichuan, Huangtengge              | CVH           | Confirmed |
| 103.7572  | 36.0758 | WUK0079689  | Mingfang Wang  | 1941-07-03 | Gansu, Xinglongshan               | CVH           | Confirmed |
| 103.85348 | 31.6811 | SM715003883 | Maowen's group | -          | Sichuan, Maoxian Songping         | CVH           | Confirmed |
| 103.9551  | 36.0039 | 20130812    | Zhonghu Li     | 2013-08-12 | Gansu, Hepinzhen Guantangou       | Current study | Confirmed |
| 103.9837  | 35.1236 | 20160731    | Zhonghu Li     | 2016-07-31 | Gansu, Weiyuanxian Huiyuanzhen    | Current study | Confirmed |
| 104.1125  | 35.8431 | WUK0034009  | K.T. Fu        | 1937-07-17 | Gansu, Yuzhong Lapulen            | CVH           | Confirmed |
| 104.2480  | 34.2263 | 20151106    | Zhonghu Li     | 2015-11-06 | Gansu, Longnan Niujiacun          | Current study | Confirmed |

|                    |          |         |            |             |            |                               |               |           |
|--------------------|----------|---------|------------|-------------|------------|-------------------------------|---------------|-----------|
|                    | 104.6744 | 35.3104 | 20130805   | Zhonghu Li  | 2013-08-05 | Gansu, Yuzhong Mapoyangzhai   | Current study | Confirmed |
|                    | 105.0309 | 33.6442 | 20160804   | Weibing Fan | 2016-05-04 | Gansu, Zhouquxian Gongbaxiang | Current study | Confirmed |
|                    | 105.7260 | 34.5686 | WUK0162035 | Kubjun Fu   | 1960-08-08 | Gansu, Tianshui               | CVH           | Confirmed |
|                    | 111.5310 | 37.8906 | 20150903   | Zhonghu Li  | 2015-09-03 | Shanxi, Jiaocheng             | Current study | Confirmed |
|                    | 107.7011 | 34.0535 | 20140819   | Weibing Fan | 2014-08-19 | Shaanxi, Taibai Mountain      | Current study | Confirmed |
|                    | 106.5856 | 35.1610 | 20150824   | Zhonghu Li  | 2015-08-24 | Gansu, Xihua Niushezhen       | Current study | Confirmed |
|                    | 106.6734 | 35.0690 | 20150822   | Weibing Fan | 2015-08-22 | Shaanxi, Longxian Tiemahe     | Current study | Confirmed |
|                    | 108.5268 | 33.9248 | 20150704   | Weibing Fan | 2015-07-04 | Shaanxi, Zhuque               | Current study | Confirmed |
|                    | 108.8230 | 33.8205 | 20150519   | Zhonghu Li  | 2015-05-19 | Shaanxi, Jiwozi               | Current study | Confirmed |
|                    | 105.1848 | 34.5744 | 20150717   | Yun Jia     | 2015-07-17 | Gansu, Gangguxian             | Current study | Confirmed |
| <i>N. oviforme</i> | 106.5821 | 35.1609 | 20141001   | Weibing Fan | 2014-10-01 | Gansu, Xihuazhen Caotancun    | Current study | Confirmed |
| ( <i>N</i> = 15)   | 108.7230 | 33.7205 | 20160731   | Zhonghu Li  | 2016-07-31 | Shaanxi, Fenyukou             | Current study | Confirmed |
|                    | 108.2716 | 33.2794 | 20160804   | Zhonghu Li  | 2016-08-04 | Shaanxi, Pinheliang           | Current study | Confirmed |
|                    | 107.1761 | 35.5032 | 20160726   | Yun Jia     | 2016-07-26 | Shaanxi, Guanshan             | Current study | Confirmed |
|                    | 108.6230 | 33.6205 | 201678     | Yun Jia     | 2016-07-08 | Shaanxi, Fenyukou             | Current study | Confirmed |
|                    | 108.8230 | 33.8205 | 20160708   | Zhonghu Li  | 2016-07-08 | Shaanxi, Changanqu            | Current study | Confirmed |
|                    | 106.4023 | 35.1588 | 20160812   | Zhonghu Li  | 2016-08-12 | Gansu, Huaxiangxian           | Current study | Confirmed |
|                    | 106.6531 | 35.2182 | 20160817   | Yun Jia     | 2016-08-17 | Gansu, Guanshang              | Current study | Confirmed |
|                    | 108.5268 | 33.9248 | 20160822   | Yun Jia     | 2016-08-22 | Shaanxi, Huxian               | Current study | Confirmed |

**Table S6** Gene diversity, nucleotide diversity, and haplotype frequencies of the cpDNA and mtDNA sequences for all studied populations of four *Notopterygium* species.  $N$ , number of samples;  $\theta_{wt}$ , Watterson's  $\theta$ ;  $\pi_t$ , total nucleotide diversity. Note: H(a) b means that haplotype "a" is shown by "b" individuals. SD (standard deviation).

| Species           | Population | cpDNA         |                               |                      |     | mtDNA         |                               |                  |     |
|-------------------|------------|---------------|-------------------------------|----------------------|-----|---------------|-------------------------------|------------------|-----|
|                   |            | $\theta_{wt}$ | $\pi_t$ (SD) $\times 10^{-2}$ | cpDNA haplotypes     | $N$ | $\theta_{wt}$ | $\pi_t$ (SD) $\times 10^{-2}$ | mtDNA haplotypes | $N$ |
| <i>N. incisum</i> | A          | 0             | 0                             | H(1) 1 H(2) 5        | 6   | 0             | 0                             | H(1) 6           | 6   |
|                   | B          | 0             | 0                             | H(2) 3               | 3   | 0             | 0                             | H(1) 2           | 2   |
|                   | C          | 0             | 0                             | H(2) 5               | 5   | 0             | 0                             | H(1) 6           | 6   |
|                   | D          | 0.4           | 0.023 (0.013)                 | H(3) 4 H(4) 1        | 5   | 0             | 0                             | H(2) 6           | 6   |
|                   | E          | 0             | 0                             | H(5) 5               | 5   | 0             | 0                             | H(2) 5           | 5   |
|                   | G          | 0.5           | 0.084 (0.045)                 | H(6) 3 H(7) 1        | 4   | 0.7           | 0.238 (0.106)                 | H(1) 3 H(3) 1    | 4   |
|                   | H          | –             | –                             | H(8) 1               | 1   | 0             | 0                             | H(1) 6           | 6   |
|                   | I          | 0             | 0                             | H(2) 5               | 5   | 0             | 0                             | H(1) 6           | 6   |
|                   | J          | 1             | 0.113 (0.040)                 | H(5) 1 H(7) 1 H(9) 1 | 3   | 0             | 0                             | H(1) 4           | 4   |
|                   | L          | 0             | 0                             | H(5) 2               | 2   | 0             | 0                             | H(2) 5           |     |
|                   | N          | 1             | 0.057 (0.028)                 | H(10) 1 H(11) 1      | 2   | 0.6           | 0.079 (0.023)                 | H(1) 2 H(2) 3    | 5   |
|                   | Q          | 1             | 0.112 (0.056)                 | H(5) 1 H(12) 1       | 2   | 0.4           | 0.053 (0.031)                 | H(1) 1 H(2) 4    | 5   |
|                   | S          | 0             | 0                             | H(13) 2              | 2   | 0             | 0                             | H(1) 2           | 2   |
|                   | T          | 0             | 0                             | H(5) 2               | 2   | 0             |                               | H(2) 2           | 2   |
|                   | U          | 0             | 0                             | H(8) 1 H(14) 1       | 2   | 0.6           | 0.079 (0.023)                 | H(1) 3 H(2) 2    | 5   |
| V                 | 0.4        | 0.045 (0.027) | H(8) 4 H(15) 1                | 5                    | 0   | 0             | H(1) 2                        | 2                |     |



|    |       |               |                         |   |       |               |               |   |
|----|-------|---------------|-------------------------|---|-------|---------------|---------------|---|
| W  | 0     | 0             | H(5) 1 H(6) 3 H(16) 1   | 5 | 0.4   | 0.053 (0.031) | H(1) 4 H(2) 1 | 5 |
| X  | 0     | 0             | H(5) 1 H(16) 1          | 2 | 0     | 0             | H(1) 2        | 2 |
| Y  | 0     | 0             | H(8) 2                  | 2 | 0     | 0             | H(1) 2        | 2 |
| Z  | 0     | 0             | H(5) 1 H(17) 1          | 2 | 0     | 0             | H(1) 1 H(4) 1 | 2 |
| HA | 0.4   | 0.023 (0.013) | H(2) 4 H(18) 1          | 5 | 0     | 0             | H(1) 2        | 2 |
| HB | 0.6   | 0.102 (0.030) | H(19) 1 H(20) 2 H(21) 2 | 5 | 0     | 0             | H(1) 2        | 2 |
| HC | 1     | 0.112 (0.056) | H(19) 1 H(22) 1         | 2 | 0     | 0             | H(1) 2        | 2 |
| HF | 0     | 0             | H(3) 2                  | 2 | 0     | 0             | H(2) 5        | 5 |
| HH | 0     | 0             | H(8) 2                  | 2 | 0     | 0             | H(1) 2        | 2 |
| HI | 0     | 0             | H(2) 5                  | 5 | 0     | 0             | H(1) 2        | 2 |
| KA | 0     | 0             | H(23) 3                 | 3 | 0     | 0             | H(1) 6        | 6 |
| KC | 0     | 0             | H(23) 2 H(24) 1 H(25) 1 | 4 | 0     | 0             | H(1) 5        | 5 |
| KD | 0     | 0             | H(24) 5                 | 5 | 0.333 | 0.044 (0.028) | H(1) 5 H(5) 1 | 6 |
| KF | 0     | 0             | H(24) 5                 | 5 | 0     | 0             | H(1) 6        | 6 |
| KG | 0.4   | 0.067 (0.040) | H(26) 4 H(27) 1         | 5 | 0     | 0             | H(1) 2        | 2 |
| KH | 0     | 0             | H(24) 5                 | 5 | 0     | 0             | H(5) 6        | 6 |
| KI | 0     | 0             | H(23) 3                 | 3 | 0     | 0             | H(1) 5        | 5 |
| KJ | 0     | 0             | H(23) 6                 | 6 | 0     | 0             | H(1) 6        | 6 |
| KK | –     | –             | H(23) 1                 | 1 | 0     | 0             | H(1) 6        | 6 |
| KL | 0     | 0             | H(24) 2                 | 2 | 0     | 0             | H(5) 5        | 5 |
| KM | 0     | 0             | H(28) 5                 | 5 | 0     | 0             | H(1) 2        | 2 |
| KO | 1     | 0.056 (0.028) | H(23) 1 H(29) 1         | 2 | 0     | 0             | H(1) 2        | 2 |
| KQ | 0.667 | 0.037 (0.018) | H(24) 1 H(27) 1 H(30) 1 | 3 | 0     | 0             | H(1) 4        | 4 |

|                      |    |       |               |                                    |   |   |   |        |   |
|----------------------|----|-------|---------------|------------------------------------|---|---|---|--------|---|
| <i>N. franchetii</i> | KR | 0     | 0             | H(31) 2                            | 2 | 0 | 0 | H(1) 2 | 2 |
|                      | KV | 0     | 0             | H(24) 2                            | 2 | 0 | 0 | H(1) 3 | 3 |
|                      | KX | 0     | 0             | H(24) 5 H(32) 1                    | 6 | 0 | 0 | H(5) 6 | 6 |
|                      | KZ | 0.6   | 0.034 (0.007) | H(24) 3 H(33) 3                    | 6 | 0 | 0 | H(1) 6 | 6 |
|                      | YA | 0.6   | 0.010 (0.030) | H(23) 3 H(34) 2                    | 5 | 0 | 0 | H(1) 2 | 2 |
|                      | YB | 0     | 0             | H(24) 2                            | 2 | 0 | 0 | H(1) 2 | 2 |
|                      | YC | 0     | 0             | H(35) 5                            | 5 | 0 | 0 | H(1) 2 | 2 |
|                      | YD | 0     | 0             | H(23) 2                            | 2 | 0 | 0 | H(1) 2 | 2 |
|                      | YE | 0     | 0             | H(23) 2                            | 2 | 0 | 0 | H(1) 2 | 2 |
|                      | YF | 0.7   | 0.067 (0.027) | H(35) 2 H(36) 1 H(37) 1<br>H(38) 1 | 5 | 0 | 0 | H(1) 2 | 2 |
|                      | YH | –     | –             | –                                  |   | 0 | 0 | H(1) 2 | 2 |
|                      | YJ | –     | –             | –                                  |   | 0 | 0 | H(1) 2 | 2 |
|                      | YK | 0     | 0             | H(24) 2                            | 2 | 0 | 0 | H(5) 5 | 5 |
|                      | YM | 0     | 0             | H(23) 1 H(24) 1                    | 2 | 0 | 0 | H(1) 2 | 2 |
| <i>N. oviforme</i>   | LA | 0     | 0             | H(39) 5                            | 5 | 0 | 0 | H(5) 5 | 5 |
|                      | LB | 0     | 0             | H(40) 2                            | 2 | 0 | 0 | H(5) 4 | 4 |
|                      | LC | 0     | 0             | H(41) 2                            | 2 | 0 | 0 | H(5) 5 | 5 |
|                      | LD | 0.5   | 0.056 (0.030) | H(42) 1 H(43) 3                    | 4 | 0 | 0 | H(1) 4 | 4 |
|                      | LE | 0.5   | 0.056 (0.030) | H(44) 3 H(45) 1                    | 4 | 0 | 0 | H(1) 4 | 4 |
|                      | LF | 0.6   | 0.034 (0.010) | H(27) 3 H(46) 2                    | 5 | 0 | 0 | H(1) 2 | 2 |
|                      | LG | 0     | 0             | H(47) 2                            | 2 | 0 | 0 | H(5) 5 | 5 |
|                      | LK | 0.667 | 0.187 (0.088) | H(48) 2 H(49) 1                    | 3 | 0 | 0 | H(1) 2 | 2 |

|                     |     |     |               |                 |   |     |               |               |   |
|---------------------|-----|-----|---------------|-----------------|---|-----|---------------|---------------|---|
|                     | LO  | 0   | 0             | H(50) 2         | 2 | 0   | 0             | H(1) 2        | 2 |
|                     | LP  | –   | –             | H(51) 1         | 1 | 0.5 | 0.066 (0.035) | H(1) 1 H(5) 3 | 4 |
|                     | LQ  | 0   | 0             | H(45) 2         | 2 | 0   | 0             | H(1) 2        | 2 |
|                     | LR  | –   | –             | –               |   | 0   | 0             | H(1) 2        | 2 |
|                     | LT  | 0.4 | 0.067 (0.040) | H(52) 4 H(53) 1 | 5 | 0   | 0             | H(5) 5        | 5 |
|                     | LV  | –   | –             | –               |   | 0   | 0             | H(1) 4        | 4 |
|                     | LU  | 0   | 0             | H(54)2          | 2 | 0   | 0             | H(5) 5        | 5 |
|                     | LQA | 0   | 0             | H(55) 1 H(56) 1 | 2 | 0   | 0             | H(1) 2        | 2 |
|                     | LQB | 0   | 0             | H(57) 2         | 2 | 0   | 0             | H(1) 2        | 2 |
| <i>N. forrestii</i> | LQC | 0   | 0             | H(56) 2         | 2 | 0   | 0             | H(1) 2        | 2 |
|                     | LQD | 0   | 0             | H(56) 4         | 4 | 0   | 0             | H(1) 2        | 2 |

**Table S7** Analysis of molecular variance (AMOVA) based on variation at 10 nuclear loci, cpDNA, and mtDNA in four species of *Notopterygium*.

| Source of variation                           | d. f. | SS      | VC      | Variation (%) | Fixation index           |
|-----------------------------------------------|-------|---------|---------|---------------|--------------------------|
| <b>Nuclear locus 35</b>                       |       |         |         |               |                          |
| Among all species                             | 3     | 109.603 | 0.34136 | 66.30853      | $F_{CT} = 0.66309^{***}$ |
| Among populations within species              | 68    | 35.168  | 0.06192 | 12.02688      | $F_{ST} = 0.78335^{***}$ |
| Within populations                            | 404   | 45.058  | 0.11153 | 21.66459      | $F_{SC} = 0.35697^{***}$ |
| Total                                         | 475   | 189.830 | 0.51481 |               |                          |
| Among populations within <i>N. incisum</i>    | 25    | 0.618   | 0.00108 | 5.55940       | $F_{ST} = 0.05559$       |
| Within populations                            | 128   | 2.350   | 0.01836 | 94.44060      |                          |
| Total                                         | 153   | 2.968   | 0.01944 |               |                          |
| Among populations within <i>N. franchetii</i> | 26    | 19.714  | 0.08481 | 44.91591      | $F_{ST} = 0.44916^{***}$ |
| Within populations                            | 183   | 19.033  | 0.10401 | 55.08409      |                          |
| Total                                         | 209   | 38.748  | 0.18882 |               |                          |
| Among populations within <i>N. oviforme</i>   | 14    | 10.211  | 0.08668 | 27.50894      | $F_{ST} = 0.27509^{***}$ |
| Within populations                            | 73    | 16.675  | 0.22842 | 72.49106      |                          |
| Total                                         | 87    | 26.886  | 0.31511 |               |                          |

|                                               |     |          |         |          |                          |
|-----------------------------------------------|-----|----------|---------|----------|--------------------------|
| Among populations within <i>N. forrestii</i>  | 3   | 4.625    | 0.20625 | 37.07865 | $F_{ST} = 0.37079^{***}$ |
| Within populations                            | 20  | 7        | 0.35000 | 62.92135 |                          |
| Total                                         | 23  | 11.625   | 0.55625 |          |                          |
| <b>Nuclear locus 32125</b>                    |     |          |         |          |                          |
| Among all species                             | 3   | 893.262  | 3.08733 | 84.13877 | $F_{CT} = 0.84139^{***}$ |
| Among populations within species              | 68  | 113.958  | 0.20884 | 5.69160  | $F_{ST} = 0.89830^{***}$ |
| Within populations                            | 380 | 141.800  | 0.37316 | 10.16963 | $F_{SC} = 0.35884^{***}$ |
| Total                                         | 451 | 1149.020 | 3.66934 |          |                          |
| Among populations within <i>N. incisum</i>    | 25  | 94.691   | 0.36862 | 43.73685 | $F_{ST} = 0.43737^{***}$ |
| Within populations                            | 208 | 98.633   | 0.47420 | 56.26315 |                          |
| Total                                         | 233 | 193.325  | 0.84282 |          |                          |
| Among populations within <i>N. franchetii</i> | 26  | 10.913   | 0.06521 | 30.91913 | $F_{ST} = 0.30919^{***}$ |
| Within populations                            | 87  | 12.675   | 0.14569 | 69.08087 |                          |
| Total                                         | 113 | 23.588   | 0.21090 |          |                          |
| Among populations within <i>N. oviforme</i>   | 14  | 3.357    | 0.01839 | 11.05487 | $F_{ST} = 0.11055^*$     |
| Within populations                            | 61  | 9.025    | 0.14795 | 88.94513 |                          |
| Total                                         | 75  | 12.382   | 0.16634 |          |                          |

|                                               |     |          |         |          |                          |
|-----------------------------------------------|-----|----------|---------|----------|--------------------------|
| Among populations within <i>N. forrestii</i>  | 3   | 4.998    | 0.11408 | 11.31197 | $F_{ST} = 0.11312^*$     |
| Within populations                            | 24  | 21.467   | 0.89444 | 88.68803 |                          |
| Total                                         | 27  | 26.464   | 1.00853 |          |                          |
| <b>Nuclear locus 51964</b>                    |     |          |         |          |                          |
| Among all species                             | 3   | 1023.825 | 4.33780 | 89.05501 | $F_{CT} = 0.89055^{***}$ |
| Among populations within species              | 67  | 98.982   | 0.23542 | 4.83308  | $F_{ST} = 0.93888^{***}$ |
| Within populations                            | 287 | 85.442   | 0.29771 | 6.11191  | $F_{SC} = 0.44158^{***}$ |
| Total                                         | 357 | 1208.249 | 4.87092 |          |                          |
| Among populations within <i>N. incisum</i>    | 25  | 9.651    | 0.03415 | 12.70237 | $F_{ST} = 0.12702^{***}$ |
| Within populations                            | 90  | 21.125   | 0.23472 | 87.29763 |                          |
| Total                                         | 115 | 30.776   | 0.26888 |          |                          |
| Among populations within <i>N. franchetii</i> | 26  | 77.611   | 0.44155 | 54.96861 | $F_{ST} = 0.54969^{***}$ |
| Within populations                            | 135 | 48.833   | 0.36173 | 45.03139 |                          |
| Total                                         | 151 | 126.444  | 0.80328 |          |                          |
| Among populations within <i>N. oviforme</i>   | 13  | 11.720   | 0.13152 | 29.81107 | $F_{ST} = 0.29811^{***}$ |
| Within populations                            | 50  | 15.483   | 0.30967 | 70.18893 |                          |

|                                               |     |          |         |          |                          |
|-----------------------------------------------|-----|----------|---------|----------|--------------------------|
| Total                                         | 63  | 27.203   | 0.44119 |          |                          |
| <b>Nuclear locus OG29988</b>                  |     |          |         |          |                          |
| Among all species                             | 3   | 284.425  | 1.00475 | 88.89392 | $F_{CT} = 0.88894^{***}$ |
| Among populations within species              | 68  | 26.403   | 0.05242 | 4.63755  | $F_{ST} = 0.93531^{***}$ |
| Within populations                            | 362 | 26.467   | 0.07311 | 6.46853  | $F_{SC} = 0.41757^{***}$ |
| Total                                         | 433 | 337.295  | 1.13028 |          |                          |
| Among populations within <i>N. incisum</i>    | 25  | 14.267   | 0.07289 | 37.67329 | $F_{ST} = 0.37673^{***}$ |
| Within populations                            | 136 | 16.4     | 0.12059 | 62.32671 |                          |
| Total                                         | 161 | 30.667   | 0.19348 |          |                          |
| Among populations within <i>N. franchetii</i> | 26  | 3.394    | 0.01314 | 24.41672 | $F_{ST} = 0.24417^{***}$ |
| Within populations                            | 159 | 6.467    | 0.04067 | 75.58328 |                          |
| Total                                         | 185 | 9.860    | 0.05381 |          |                          |
| Among populations within <i>N. oviforme</i>   | 14  | 8.743    | 0.12099 | 64.89378 | $F_{ST} = 0.64894^{***}$ |
| Within populations                            | 55  | 3.600    | 0.06545 | 35.10622 |                          |
| Total                                         | 69  | 12.343   | 0.18645 |          |                          |
| <b>Nuclear locus 9122</b>                     |     |          |         |          |                          |
| Among all species                             | 3   | 1292.616 | 5.59195 | 83.46143 | $F_{CT} = 0.83461^{***}$ |

|                                               |     |          |         |          |                          |
|-----------------------------------------------|-----|----------|---------|----------|--------------------------|
| Among populations within species              | 64  | 220.782  | 0.51513 | 7.68840  | $F_{ST} = 0.91150^{***}$ |
| Within populations                            | 308 | 182.633  | 0.59297 | 8.85017  | $F_{SC} = 0.46488^{***}$ |
| Total                                         | 375 | 1696.032 | 6.70005 |          |                          |
| Among populations within <i>N. incisum</i>    | 25  | 70.813   | 0.44976 | 42.90941 | $F_{ST} = 0.42909^{***}$ |
| Within populations                            | 104 | 62.233   | 0.59840 | 57.09059 |                          |
| Total                                         | 129 | 133.046  | 1.04815 |          |                          |
| Among populations within <i>N. franchetii</i> | 25  | 66.561   | 0.28954 | 34.25156 | $F_{ST} = 0.34252^{***}$ |
| Within populations                            | 164 | 91.150   | 0.55579 | 65.74844 |                          |
| Total                                         | 189 | 157.711  | 0.84533 |          |                          |
| Among populations within <i>N. oviforme</i>   | 11  | 75.909   | 1.66244 | 66.74946 | $F_{ST} = 0.66749^{***}$ |
| Within populations                            | 32  | 26.500   | 0.82812 | 33.25054 |                          |
| Total                                         | 43  | 102.409  | 2.49056 |          |                          |
| Among populations within <i>N. forrestii</i>  | 3   | 7.500    | 0.74639 | 68.46748 | $F_{ST} = 0.68467^{***}$ |
| Within populations                            | 8   | 2.75     | 0.34375 | 31.53252 |                          |
| Total                                         | 11  | 10.25    | 1.09014 |          |                          |
| <b>Nuclear locus 25629</b>                    |     |          |         |          |                          |
| Among all species                             | 3   | 970.297  | 2.58744 | 65.38840 | $F_{CT} = 0.65388^{***}$ |



|                                               |     |          |         |          |                          |
|-----------------------------------------------|-----|----------|---------|----------|--------------------------|
| Among populations within species              | 67  | 371.640  | 0.61985 | 15.66459 | $F_{ST} = 0.81053^{***}$ |
| Within populations                            | 481 | 360.625  | 0.74974 | 18.94701 | $F_{SC} = 0.45258^{***}$ |
| Total                                         | 551 | 1702.562 | 3.95704 |          |                          |
| Among populations within <i>N. incisum</i>    | 24  | 186.628  | 0.87198 | 58.40021 | $F_{ST} = 0.58400^{***}$ |
| Within populations                            | 181 | 112.425  | 0.62113 | 41.59979 |                          |
| Total                                         | 205 | 299.053  | 1.49311 |          |                          |
| Among populations within <i>N. franchetii</i> | 26  | 137.728  | 0.53292 | 36.30638 | $F_{ST} = 0.36306^{***}$ |
| Within populations                            | 195 | 182.308  | 0.93491 | 63.69362 |                          |
| Total                                         | 221 | 320.036  | 1.46783 |          |                          |
| Among populations within <i>N. oviforme</i>   | 14  | 45.117   | 0.41992 | 40.52197 | $F_{ST} = 0.40522^{***}$ |
| Within populations                            | 79  | 48.692   | 0.61635 | 59.47803 |                          |
| Total                                         | 93  | 93.809   | 1.03627 |          |                          |
| Among populations within <i>N. forrestii</i>  | 3   | 2.167    | 0.00833 | 1.24287  | $F_{ST} = 0.01243$       |
| Within populations                            | 26  | 17.200   | 0.66154 | 98.75713 |                          |
| Total                                         | 29  | 19.367   | 0.66986 |          |                          |
| <b>Nuclear locus 25679</b>                    |     |          |         |          |                          |
| Among all species                             | 3   | 469.580  | 1.52596 | 63.59405 | $F_{CT} = 0.63594^{***}$ |

|                                               |     |          |          |          |                          |
|-----------------------------------------------|-----|----------|----------|----------|--------------------------|
| Among populations within species              | 66  | 161.439  | 0.29230  | 12.18159 | $F_{ST} = 0.75776^{***}$ |
| Within populations                            | 380 | 220.883  | 0.58127  | 24.22435 | $F_{SC} = 0.33460^{***}$ |
| Total                                         | 449 | 851.902  | 2.39954  |          |                          |
| Among populations within <i>N. incisum</i>    | 25  | 68.111   | 0.30768  | 31.18722 | $F_{ST} = 0.31187^{***}$ |
| Within populations                            | 148 | 100.475  | 0.67889  | 68.81278 |                          |
| Total                                         | 173 | 168.586  | 0.98657  |          |                          |
| Among populations within <i>N. franchetii</i> | 26  | 27.130   | 0.11748  | 26.96786 | $F_{ST} = 0.26968^{***}$ |
| Within populations                            | 141 | 44.858   | 0.31814  | 73.03214 |                          |
| Total                                         | 167 | 71.988   | 0.43562  |          |                          |
| Among populations within <i>N. oviforme</i>   | 12  | 59.547   | 0.64192  | 45.38783 | $F_{ST} = 0.45388^{***}$ |
| Within populations                            | 73  | 56.383   | 0.77237  | 54.61217 |                          |
| Total                                         | 85  | 115.930  | 1.41429  |          |                          |
| Among populations within <i>N. forrestii</i>  | 3   | 6.652    | 0.21607  | 16.86861 | $F_{ST} = 0.16869^{**}$  |
| Within populations                            | 18  | 19.167   | 1.06481  | 83.13139 |                          |
| Total                                         | 21  | 25.818   | 1.28088  |          |                          |
| <b>Nuclear locus 29206</b>                    |     |          |          |          |                          |
| Among all species                             | 3   | 3656.184 | 42.91421 | 94.17464 | $F_{CT} = 0.94175^{***}$ |

|                                              |     |          |          |          |                          |
|----------------------------------------------|-----|----------|----------|----------|--------------------------|
| Among populations within species             | 36  | 270.892  | 1.28316  | 2.81588  | $F_{ST} = 0.96991^{***}$ |
| Within populations                           | 152 | 208.450  | 1.37138  | 3.00948  | $F_{SC} = 0.48338^{***}$ |
| Total                                        | 191 | 4135.526 | 45.56876 |          |                          |
| Among populations within <i>N. incisum</i>   | 25  | 82.579   | 0.49895  | 42.22879 | $F_{ST} = 0.42229^{***}$ |
| Within populations                           | 112 | 76.450   | 0.68259  | 57.77121 |                          |
| Total                                        | 137 | 159.029  | 1.18154  |          |                          |
| Among populations within <i>N. forrestii</i> | 2   | 5.750    | 0.42115  | 35.37964 | $F_{ST} = 0.35380^{***}$ |
| Within populations                           | 13  | 10       | 0.76923  | 64.62036 |                          |
| Total                                        | 15  | 15.750   | 1.19038  |          |                          |
| <b>Nuclear locus OG29101</b>                 |     |          |          |          |                          |
| Among all species                            | 3   | 1833.563 | 6.27328  | 90.00281 | $F_{CT} = 0.90003^{***}$ |
| Among populations within species             | 63  | 155.201  | 0.31127  | 4.46581  | $F_{ST} = 0.94469^{***}$ |
| Within populations                           | 381 | 146.892  | 0.38554  | 5.53138  | $F_{SC} = 0.44671^{***}$ |
| Total                                        | 447 | 2135.656 | 6.97009  |          |                          |
| Among populations within <i>N. incisum</i>   | 24  | 61.627   | 0.30879  | 42.79913 | $F_{ST} = 0.42799^{***}$ |
| Within populations                           | 151 | 62.317   | 0.41269  | 57.20087 |                          |

|                                               |     |         |         |          |                       |
|-----------------------------------------------|-----|---------|---------|----------|-----------------------|
| Total                                         | 175 | 123.943 | 0.72148 |          |                       |
| Among populations within <i>N. franchetii</i> | 22  | 90.986  | 0.46163 | 49.59900 | $F_{ST} = 0.49599***$ |
| Within populations                            | 161 | 75.525  | 0.46910 | 50.40100 |                       |
| Total                                         | 183 | 166.511 | 0.93073 |          |                       |
| Among populations within <i>N. oviforme</i>   | 14  | 2.589   | 0.00552 | 3.35918  | $F_{ST} = 0.03359$    |
| Within populations                            | 57  | 9.050   | 0.15877 | 96.64082 |                       |
| Total                                         | 71  | 11.639  | 0.16429 |          |                       |
| <b>Nuclear locus OG29960</b>                  |     |         |         |          |                       |
| Among all species                             | 3   | 184.057 | 0.71283 | 77.94437 | $F_{CT} = 0.77944***$ |
| Among populations within species              | 68  | 33.454  | 0.06298 | 6.88613  | $F_{ST} = 0.84830***$ |
| Within populations                            | 332 | 46.058  | 0.13873 | 15.16950 | $F_{SC} = 0.31222***$ |
| Total                                         | 403 | 263.569 | 0.91453 |          |                       |
| Among populations within <i>N. incisum</i>    | 25  | 7.591   | 0.04382 | 34.67918 | $F_{ST} = 0.34679***$ |
| Within populations                            | 106 | 8.750   | 0.08255 | 65.32082 |                       |
| Total                                         | 131 | 16.341  | 0.12637 |          |                       |
| Among populations within <i>N. franchetii</i> | 26  | 24.697  | 0.10265 | 32.78901 | $F_{ST} = 0.32789***$ |
| Within populations                            | 169 | 35.558  | 0.21040 | 67.21099 |                       |

|                                               |     |          |          |          |                          |
|-----------------------------------------------|-----|----------|----------|----------|--------------------------|
| Total                                         | 195 | 60.255   | 0.31305  |          |                          |
| Among populations within <i>N. oviforme</i>   | 14  | 1.167    | 0.01111  | 22.22222 | $F_{ST} = 0.22222$       |
| Within populations                            | 45  | 1.750    | 0.03889  | 77.77778 |                          |
| Total                                         | 59  | 2.917    | 0.05000  |          |                          |
| <b>cpDNA</b>                                  |     |          |          |          |                          |
| Among all species                             | 3   | 993.201  | 6.44536  | 63.75000 | $F_{CT} = 0.63746^{***}$ |
| Among populations within species              | 64  | 657.645  | 2.89216  | 28.60000 | $F_{ST} = 0.92350^{***}$ |
| Within populations                            | 157 | 121.433  | 0.77346  | 7.65000  | $F_{SC} = 0.78900^{***}$ |
| Total                                         | 224 | 1772.280 | 10.11097 |          |                          |
| Among populations within <i>N. incisum</i>    | 25  | 471.584  | 5.38424  | 81.74000 | $F_{ST} = 0.81737^{***}$ |
| Within populations                            | 60  | 72.183   | 1.20306  | 18.26000 |                          |
| Total                                         | 85  | 543.767  | 6.58730  |          |                          |
| Among populations within <i>N. franchetii</i> | 24  | 83.578   | 0.84710  | 64.91000 | $F_{ST} = 0.64909^{***}$ |
| Within populations                            | 65  | 29.767   | 0.45795  | 35.09000 |                          |
| Total                                         | 89  | 113.344  | 1.30505  |          |                          |
| Among populations within <i>N. oviforme</i>   | 12  | 95.683   | 2.45649  | 77.09000 | $F_{ST} = 0.77088^{***}$ |
| Within populations                            | 26  | 18.983   | 0.73013  | 22.91000 |                          |

|                                               |     |         |         |          |                          |
|-----------------------------------------------|-----|---------|---------|----------|--------------------------|
| Total                                         | 38  | 114.667 | 3.18661 |          |                          |
| <b>mtDNA</b>                                  |     |         |         |          |                          |
| Among all species                             | 3   | 19.883  | 0.10129 | 30.78693 | $F_{CT} = 0.30787^{***}$ |
| Among populations within species              | 68  | 47.763  | 0.17964 | 54.59928 | $F_{ST} = 0.85386^{***}$ |
| Within populations                            | 191 | 9.183   | 0.04808 | 14.61378 | $F_{SC} = 0.78886^{***}$ |
| Total                                         | 262 | 76.829  | 0.32901 |          |                          |
| Among populations within <i>N. incisum</i>    | 25  | 17.869  | 0.16295 | 60.68723 | $F_{ST} = 0.60687^{***}$ |
| Within populations                            | 72  | 7.600   | 0.10556 | 39.31277 |                          |
| Total                                         | 97  | 25.469  | 0.26850 |          |                          |
| Among populations within <i>N. franchetii</i> | 26  | 16.929  | 0.17258 | 93.87454 | $F_{ST} = 0.93875^{***}$ |
| Within populations                            | 74  | 0.833   | 0.01126 | 6.12546  |                          |
| Total                                         | 100 | 17.762  | 0.18384 |          |                          |
| Among populations within <i>N. oviforme</i>   | 14  | 12.964  | 0.24523 | 93.05841 | $F_{ST} = 0.93058^{***}$ |
| Within populations                            | 41  | 0.750   | 0.01829 | 6.94159  |                          |
| Total                                         | 55  | 13.714  | 0.26352 |          |                          |

d.f., degrees of freedom; SS, sum of squares; VC, variance components;  $F_{CT}$ , differentiation among groups (i.e. the four species);  $F_{SC}$ , differentiation among populations within groups;  $F_{ST}$ , differentiation among populations. \*  $P < 0.05$ , \*\*  $P < 0.01$  and \*\*\*  $P < 0.001$ , 1000 permutations.

**Table S8** Genetic differentiation at 10 nuclear loci among: (a) *Notopterygium incisum*, (b) *N. franchetii*, (c) *N. oviforme*, and (d) *N. forrestii*.

| Group   | a vs. b    |         | a vs. c    |         | a vs. d    |         |
|---------|------------|---------|------------|---------|------------|---------|
|         | $F_{ST}$   | Da      | $F_{ST}$   | Da      | $F_{ST}$   | Da      |
| 35      | 0.42727*** | 0.00004 | 0.61085*** | 0.00090 | 0.97061*** | 0.01566 |
| 9122    | 0.92843*** | 0.02425 | 0.91491*** | 0.02155 | 0.88560*** | 0.01398 |
| 25629   | 0.83930*** | 0.01623 | 0.85974*** | 0.01471 | 0.86113*** | 0.01525 |
| 25679   | 0.82502*** | 0.01203 | 0.73059*** | 0.00851 | 0.65614*** | 0.00614 |
| 29206   | 0.66046*** | 0.00336 | 0.88157*** | 0.01374 | 0.91331*** | 0.01801 |
| 32125   | 0.91079*** | 0.01256 | 0.90478*** | 0.01234 | 0.90328*** | 0.01579 |
| 51964   | 0.95362*** | 0.01893 | 0.95696*** | 0.01774 | 0.96609*** | 0.01815 |
| OG29101 | 0.95032*** | 0.07313 | 0.96442*** | 0.08232 | 0.96301*** | 0.08796 |
| OG29960 | 0.87227*** | 0.00452 | 0.93331*** | 0.00415 | 0.92921*** | 0.00415 |
| OG29988 | 0.95151*** | 0.01298 | 0.93928*** | 0.01331 | 0.93489*** | 0.01307 |
| Average | 0.83190    | 0.01780 | 0.86964    | 0.01893 | 0.89833    | 0.02082 |
| Group   | b vs. c    |         | b vs. d    |         | c vs. d    |         |
|         | $F_{ST}$   | Da      | $F_{ST}$   | Da      | $F_{ST}$   | Da      |
| 35      | 0.53946*** | 0.00062 | 0.94376*** | 0.01570 | 0.89922*** | 0.01656 |
| 9122    | 0.78322*** | 0.00561 | 0.89021*** | 0.01421 | 0.86320*** | 0.01151 |
| 25629   | 0.44422*** | 0.00096 | 0.78430*** | 0.01363 | 0.81260*** | 0.01156 |
| 25679   | 0.52014*** | 0.00134 | 0.86302*** | 0.01352 | 0.72129*** | 0.00935 |
| 29206   | 0.82535*** | 0.01423 | 0.91913*** | 0.01895 | 0.83515*** | 0.01281 |
| 32125   | 0.25362*** | 0.00002 | 0.88910*** | 0.00839 | 0.86860*** | 0.00816 |
| 51964   | 0.63745*** | 0.00085 | 0.91486*** | 0.00996 | 0.92282*** | 0.00894 |
| OG29101 | 0.59045*** | 0.00227 | 0.72050*** | 0.00700 | 0.78310*** | 0.00429 |
| OG29960 | 0.45309*** | 0.00032 | 0.45001*** | 0.00038 | 0.19547*   | 0.00000 |
| OG29988 | 0.57380*** | 0.00021 | 0.19932*** | 0.00000 | 0.67087*** | 0.00023 |
| Average | 0.56208    | 0.00264 | 0.75742    | 0.01017 | 0.75723    | 0.00834 |

\*  $P < 0.05$ , \*\*  $P < 0.01$  and \*\*\*  $P < 0.001$ , 1000 permutations.

**Table S9** Estimated posterior distributions of the parameters according to Approximate Bayesian Computation (ABC) for the best scenario of the demographic history for the four *Notopterygium* species.

*N. incisum*

| Parameter     | N1                                   | N4                                   | NA                                   | T1                                   | T2                                   |
|---------------|--------------------------------------|--------------------------------------|--------------------------------------|--------------------------------------|--------------------------------------|
| Mean          | $8.01 \times 10^5$                   | $9.59 \times 10^4$                   | $4.21 \times 10^5$                   | $8.69 \times 10^4$                   | $1.48 \times 10^6$                   |
| <b>Median</b> | <b><math>8.10 \times 10^5</math></b> | <b><math>9.09 \times 10^4</math></b> | <b><math>4.06 \times 10^5</math></b> | <b><math>6.40 \times 10^4</math></b> | <b><math>1.48 \times 10^6</math></b> |
| Mode          | $8.12 \times 10^5$                   | $8.06 \times 10^4$                   | $2.17 \times 10^5$                   | $5.63 \times 10^4$                   | $4.06 \times 10^4$                   |
| Lower-bound   | $5.55 \times 10^5$                   | $1.21 \times 10^4$                   | $8.08 \times 10^4$                   | $2.36 \times 10^4$                   | $4.68 \times 10^4$                   |
| Upper-bound   | $9.87 \times 10^5$                   | $2.07 \times 10^5$                   | $8.49 \times 10^5$                   | $4.08 \times 10^5$                   | $2.92 \times 10^6$                   |

*N. franchetii*

| Parameter     | N1                                   | N4                                   | NA                                   | T1                                   | T2                                   |
|---------------|--------------------------------------|--------------------------------------|--------------------------------------|--------------------------------------|--------------------------------------|
| Mean          | $6.24 \times 10^5$                   | $1.08 \times 10^5$                   | $3.39 \times 10^5$                   | $8.28 \times 10^4$                   | $1.38 \times 10^6$                   |
| <b>Median</b> | <b><math>6.13 \times 10^5</math></b> | <b><math>1.00 \times 10^5</math></b> | <b><math>3.19 \times 10^5</math></b> | <b><math>4.73 \times 10^4</math></b> | <b><math>1.33 \times 10^6</math></b> |
| Mode          | $5.76 \times 10^5$                   | $9.73 \times 10^4$                   | $2.37 \times 10^5$                   | $2.27 \times 10^4$                   | $1.91 \times 10^4$                   |
| Lower-bound   | $3.49 \times 10^5$                   | $7.69 \times 10^3$                   | $7.23 \times 10^4$                   | $7.55 \times 10^3$                   | $2.44 \times 10^4$                   |
| Upper-bound   | $9.55 \times 10^5$                   | $2.62 \times 10^5$                   | $7.35 \times 10^5$                   | $5.51 \times 10^5$                   | $2.92 \times 10^6$                   |

*N. oviforme*

| Parameter     | N1                                   | NA                                   | T1                                   |
|---------------|--------------------------------------|--------------------------------------|--------------------------------------|
| Mean          | $4.53 \times 10^5$                   | $2.48 \times 10^5$                   | $2.79 \times 10^5$                   |
| <b>Median</b> | <b><math>4.25 \times 10^5</math></b> | <b><math>2.42 \times 10^5</math></b> | <b><math>2.14 \times 10^5</math></b> |
| Mode          | $3.77 \times 10^5$                   | $2.32 \times 10^5$                   | $3.25 \times 10^4$                   |
| Lower-bound   | $2.49 \times 10^5$                   | $1.92 \times 10^4$                   | $1.41 \times 10^4$                   |
| Upper-bound   | $8.39 \times 10^5$                   | $5.25 \times 10^5$                   | $8.91 \times 10^5$                   |

*N. forrestii*

| Parameter     | N5                                   | NA                                   | T1                                   |
|---------------|--------------------------------------|--------------------------------------|--------------------------------------|
| Mean          | $1.22 \times 10^5$                   | $4.93 \times 10^5$                   | $3.45 \times 10^5$                   |
| <b>Median</b> | <b><math>1.19 \times 10^5</math></b> | <b><math>4.71 \times 10^5</math></b> | <b><math>3.65 \times 10^5</math></b> |
| Mode          | $1.14 \times 10^5$                   | $1.77 \times 10^5$                   | $4.93 \times 10^5$                   |
| Lower-bound   | $5.78 \times 10^4$                   | $7.65 \times 10^4$                   | $9.53 \times 10^4$                   |
| Upper-bound   | $2.08 \times 10^5$                   | $9.70 \times 10^5$                   | $4.94 \times 10^5$                   |



**Table S10** Comparisons of the current occupied climatic niches by pairs (*A* vs. *B*) of three *Notopterygium* species, based on E-space analysis. Schoener's  $D_S$  represents niche overlap between niches ( $D_S$ ; 0 = no overlap, 1 = complete overlap). The niche equivalency (eq) and niche similarity (sim) tests are considered significant ( $P < 0.05$ , showed in bold) when niche overlap is lower than randomly expected (niche divergence; D), or larger than randomly expected (niche conservatism; C). The niche unfilling, stability, and expansion are also presented. Not applicable cases are shown as NA.

| Distribution ranges<br>(comparisons $A \rightarrow B$ ) |                      | Niche<br>Overlap<br>( $D_S$ ) | Equivalency test<br>( $P$ -value) |         | Similarity test<br>( $P$ -value) |              | Niche dynamics metrics |           |           |
|---------------------------------------------------------|----------------------|-------------------------------|-----------------------------------|---------|----------------------------------|--------------|------------------------|-----------|-----------|
| <i>A</i>                                                | <i>B</i>             |                               | less eq                           | more eq | less sim                         | more sim     | Unfilling              | Stability | Expansion |
| <i>N. franchetii</i>                                    | <i>N. incisum</i>    | 0.468                         | 0.535                             | 0.554   | 0.980                            | <b>0.040</b> | 0.124                  | 0.992     | 0.008     |
|                                                         | <i>N. oviforme</i>   | 0.022                         | <b>0.030</b>                      | NA      | 0.802                            | 0.168        | 0.459                  | 0.046     | 0.954     |
| <i>N. incisum</i>                                       | <i>N. franchetii</i> | 0.468                         | 0.475                             | 0.525   | 0.970                            | <b>0.020</b> | 0.008                  | 0.876     | 0.124     |
|                                                         | <i>N. oviforme</i>   | 0.017                         | NA                                | NA      | 0.792                            | 0.297        | 0.057                  | 0.030     | 0.970     |
| <i>N. oviforme</i>                                      | <i>N. franchetii</i> | 0.022                         | NA                                | 0.950   | 0.901                            | 0.158        | 0.954                  | 0.541     | 0.459     |
|                                                         | <i>N. incisum</i>    | 0.017                         | NA                                | NA      | 0.743                            | 0.238        | 0.970                  | 0.943     | 0.057     |

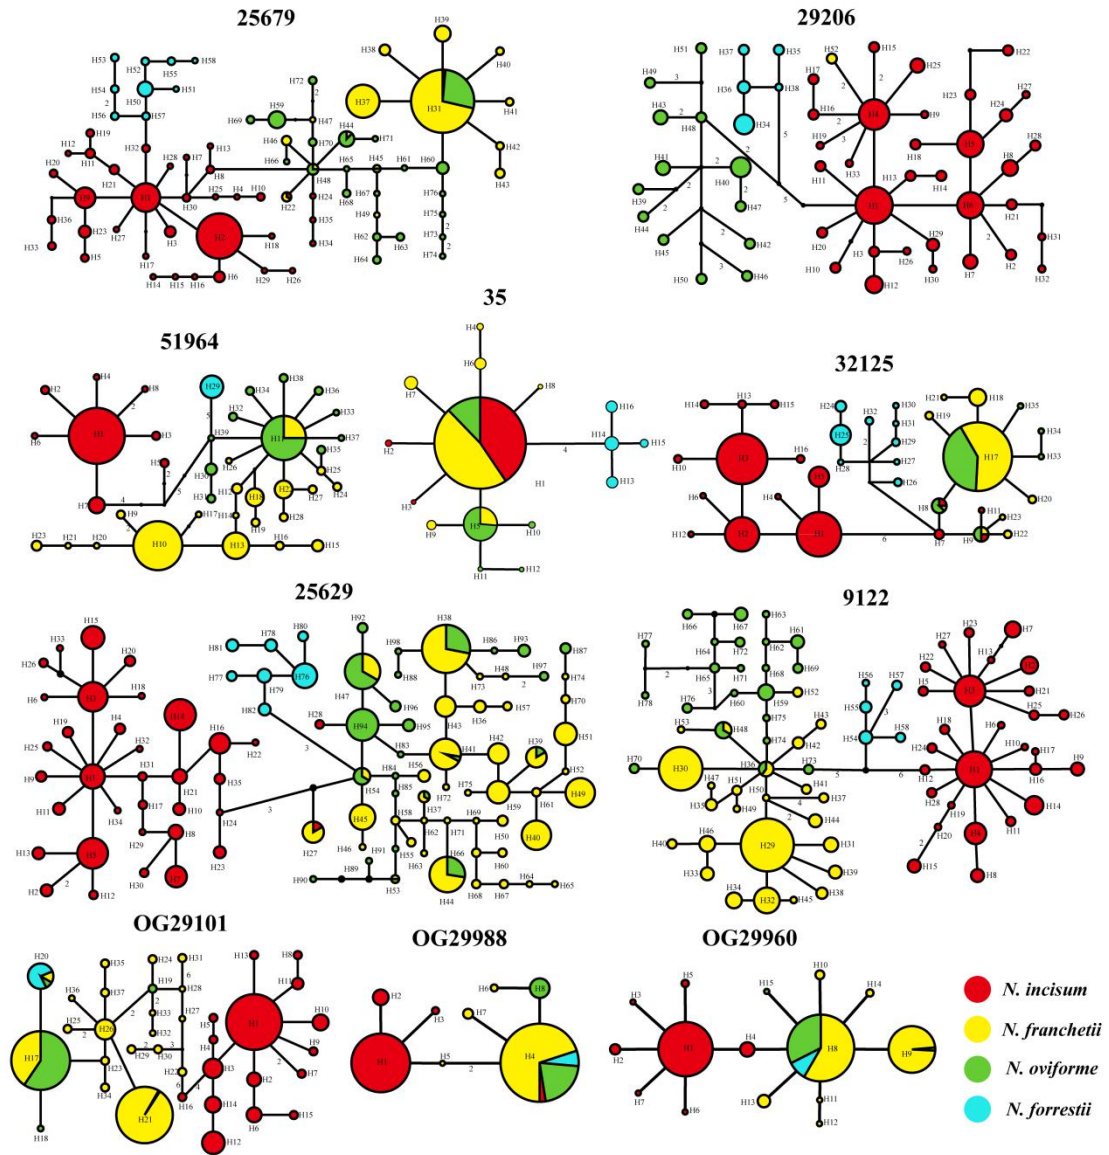

**Figure S1** Haplotype (= allele) genealogies at 10 nuclear loci in the four studied *Notopterygium* species.

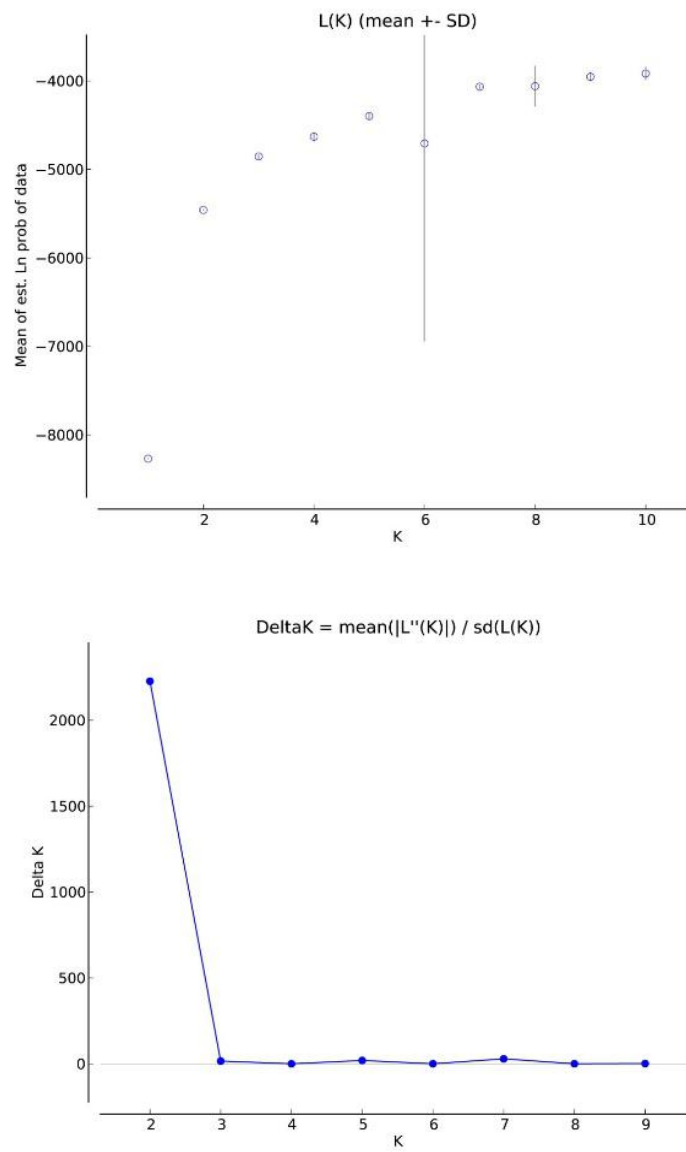

**Figure S2** Two methods used to estimate the best  $K$  values with STRUCTURE based on nuclear markers, in the four studied *Notopterygium* species.

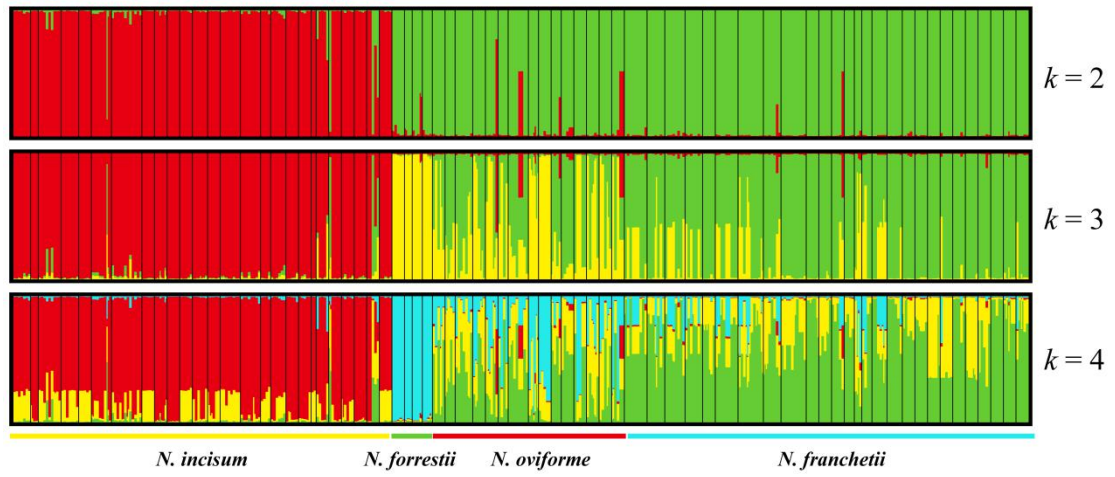

**Figure S3** STRUCTURE analysis of four *Notopterygium* species when  $K = 2-4$  clusters were assumed.

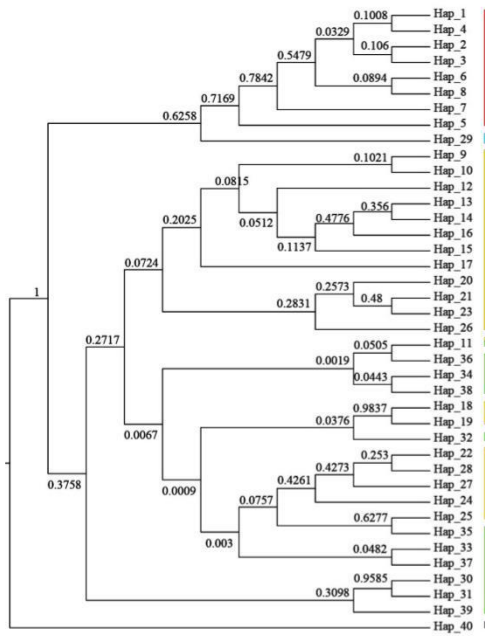

51964

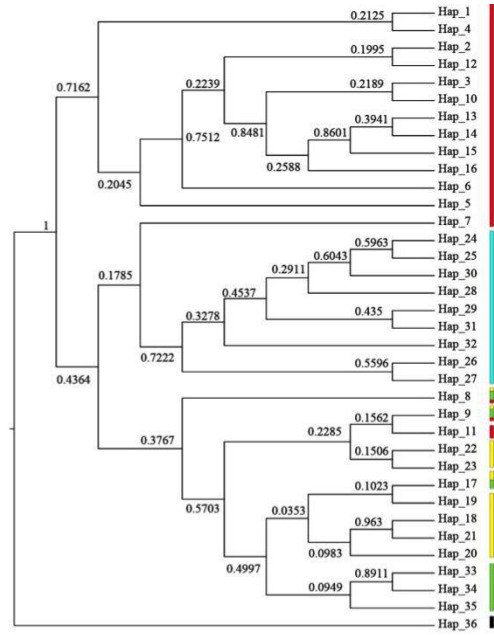

32125

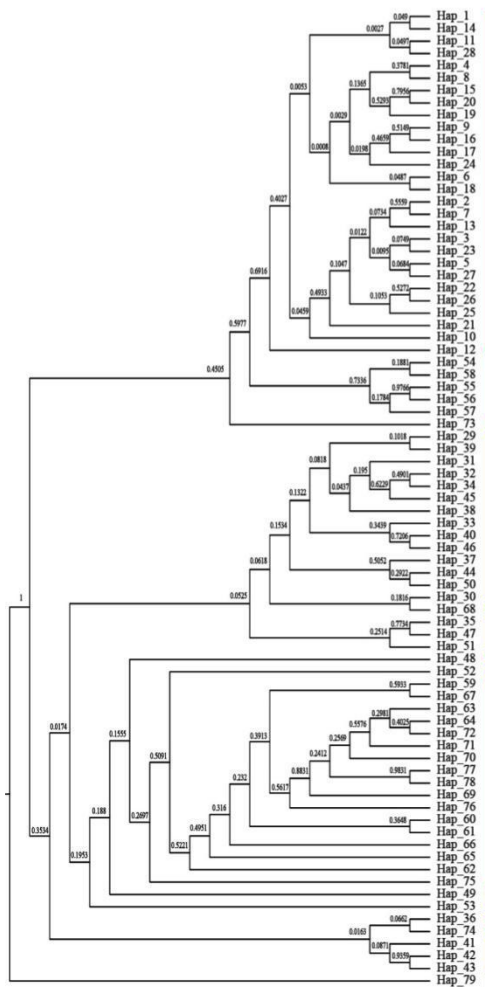

9122

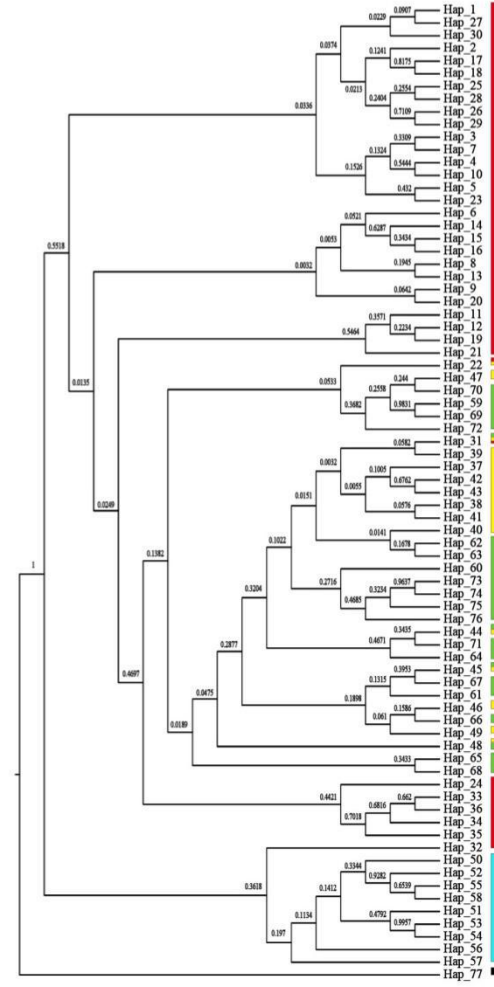

25679

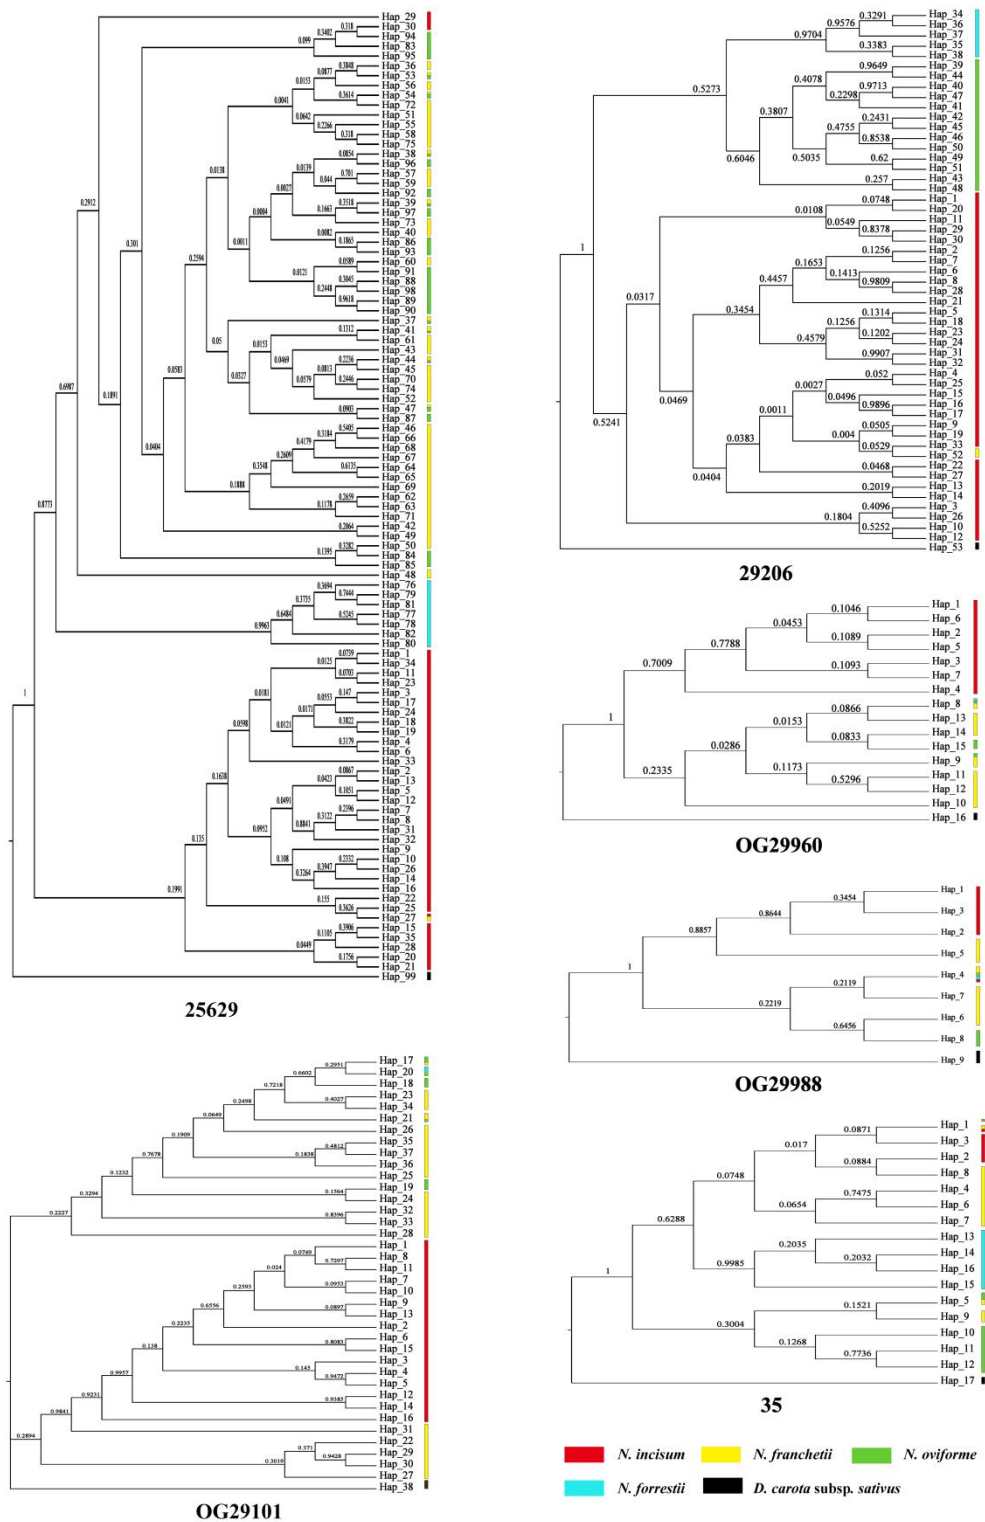

**Figure S4** Bayesian inference phylogenetic trees based on each of the 10 single copy nuclear loci, in the four studied *Notopterygium* species.

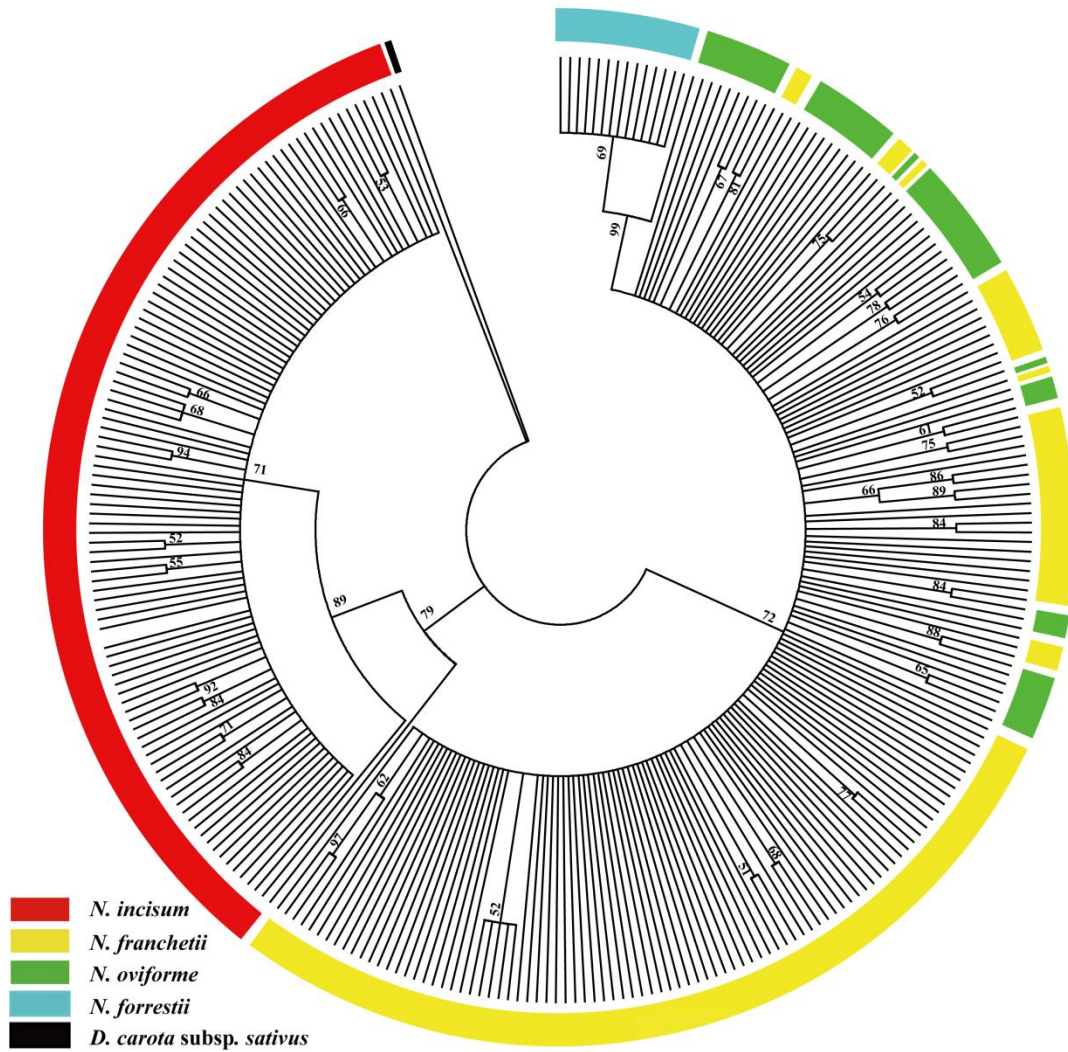

**Figure S5** The Maximum Likelihood phylogenetic tree based on concatenated 10 single copy nuclear loci, in the four studied *Notopterygium* species.

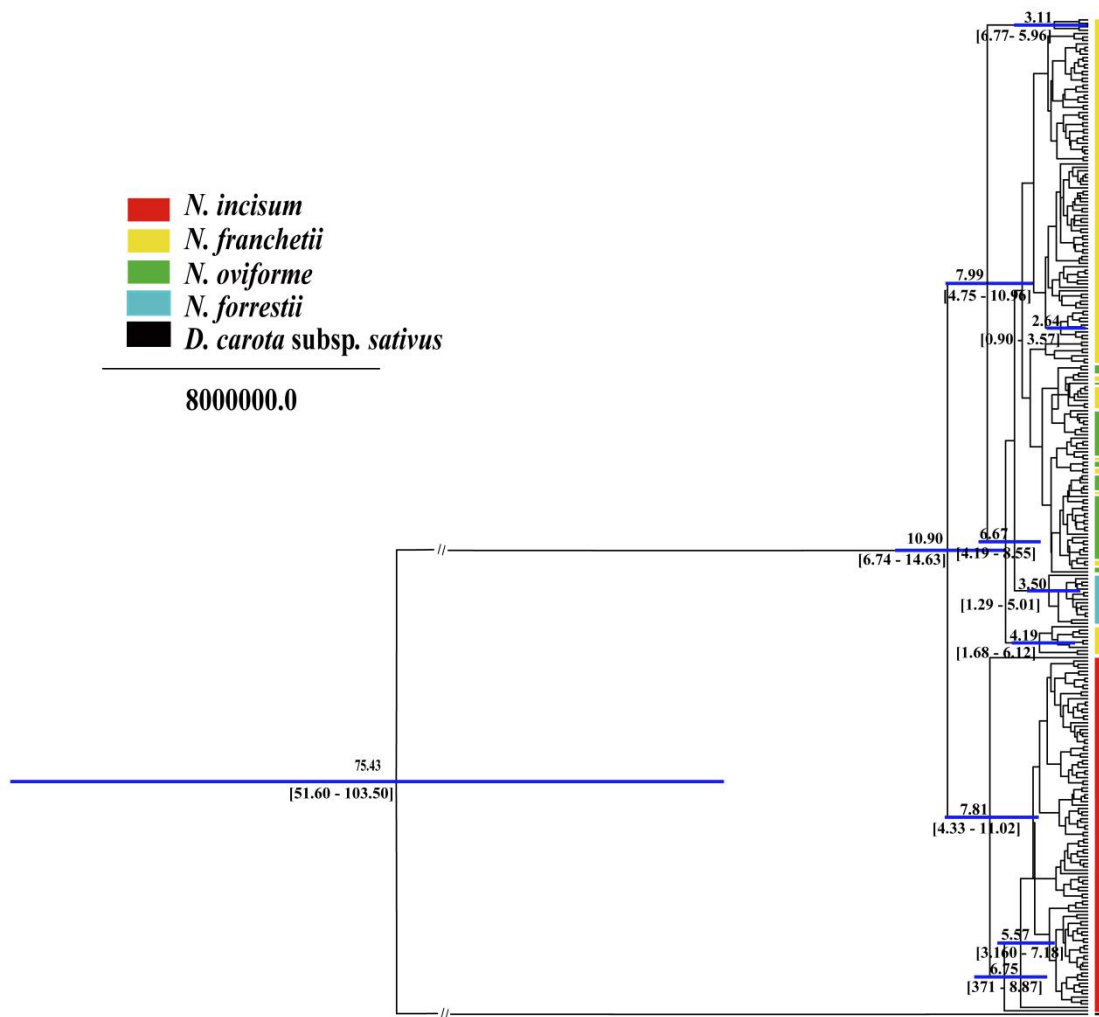

**Figure S6** BEAST-derived chronograms of four species based on concatenated 10 single copy nuclear loci, in the four studied *Notopterygium* species.



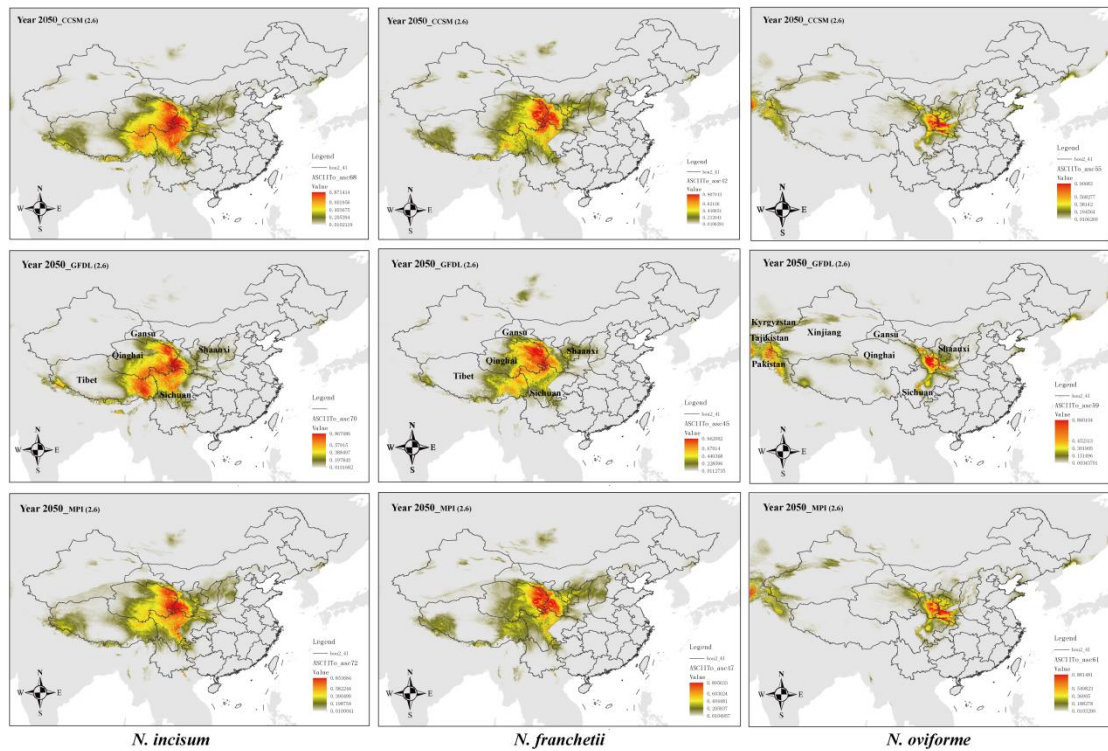

**Figure S7** Species distribution modeling results for *N. incisum*, *N. franchetii* and *N. oviforme* for the year 2050 using three models: CCSM, GFDL and MPI based on RCP 2.6. The values of maximum sensitivity plus specificity logistic threshold were 0.1447, 0.1549, and 0.4723 for *N. incisum*, *N. franchetii* and *N. oviforme*, respectively. Pixels below this value should not be considered as suitable for the species.

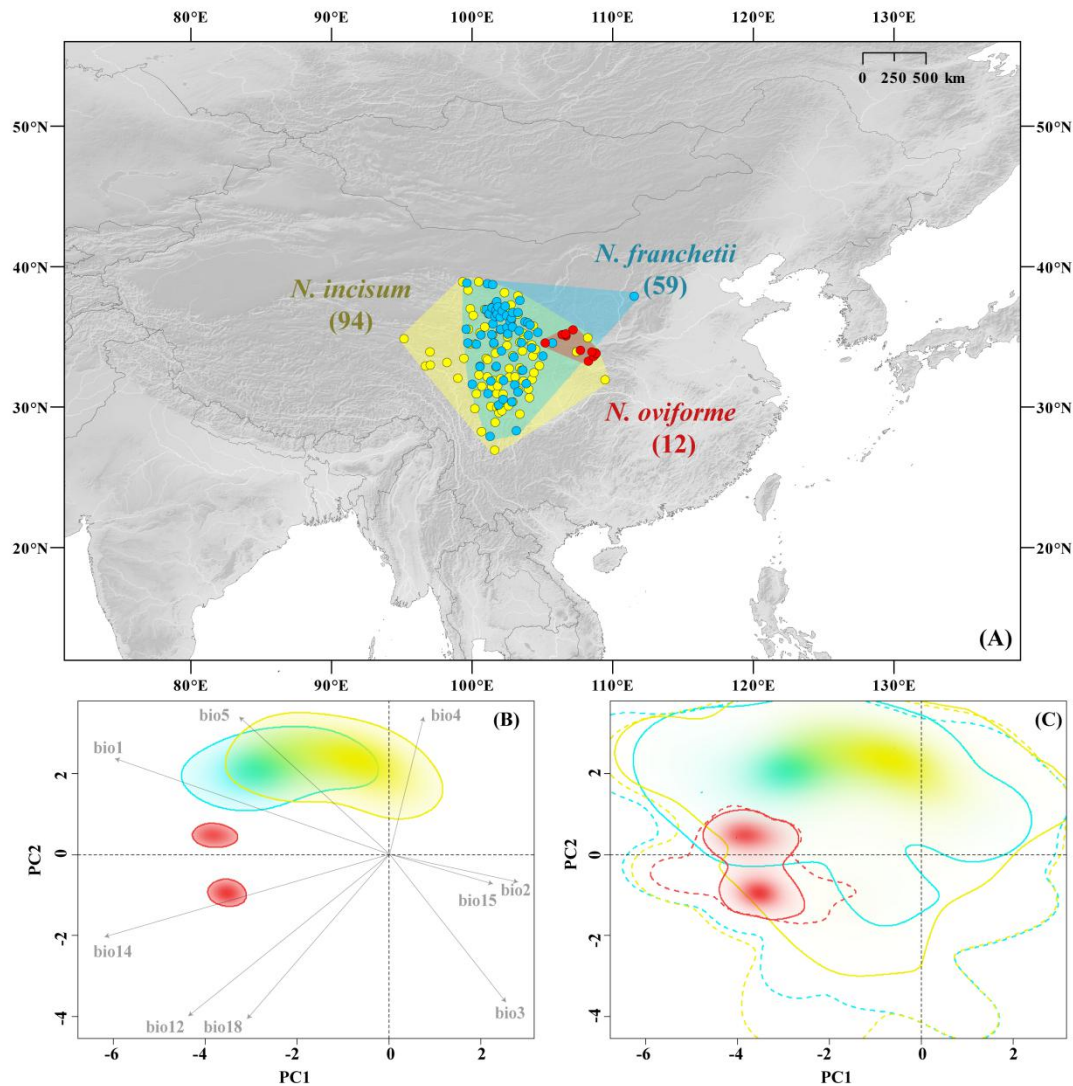

**Figure S8** (A) Geographic location of the occurrence records and background areas used for the climatic niche comparison in E-space of three *Notopterygium* species: *N. franchetii* (blue), *N. incisum* (yellow), and *N. oviforme* (red). Number below the species corresponds to the number of occurrences used for each one. (B) and (C) Global climatic space represented through a PCA-env (explaining PC1 = 52.81% and PC2 = 31.34% of the total climatic variation). In (B) the solid lines delimit the 20% of occurrence density of the current occupied niches by the species. Gray arrows outline the direction of variables contribution to the PCA-env. In (C) the solid and dashed lines illustrate the 100% of occurrence density and the 100% of available background climates, respectively.
